# Supplementary material for: The first report of X-ray characterized organosilatrane-based receptors for the electrochemical analysis of Al3+ ions
Source: Royal Society of Chemistry journal article supplement (doi:10.1039/d1nj02893f), 2021-01-01
Supplement: d1nj02893f1.pdf [file d1nj02893f1.pdf]

## First report of X-ray characterized Organosilatrane based receptor for electrochemical analysis of Al<sup>3+</sup> ions

Gurjaspreet Singh<sup>a\*</sup>, Sanjay Sharma<sup>a</sup>, Akshpreet Singh<sup>b</sup>, Ranjeet Kaur<sup>a</sup>, Pawan<sup>a</sup>, Mohit<sup>a</sup>, Shweta Rana<sup>a</sup>, Subash Chandra Sahoo<sup>a</sup>, AmarjitKaur<sup>a\*</sup>

<sup>a</sup>Department of Chemistry, Panjab University, Chandigarh, 160014, India

<sup>b</sup>Department of Chemistry, DAV College, Sector-10, Chandigarh, India-160011

\*Corresponding Author

1. Prof. Gurjaspreet Singh

Department of Chemistry and Centre of Advanced Studies

Panjab University, Chandigarh, India

Email: [gjpsingh@pu.ac.in](mailto:gjpsingh@pu.ac.in)

2. Dr. Amarjit Kaur

Department of Chemistry and Centre of Advanced Studies

Panjab University, Chandigarh, India

Email: [amarjitk@pu.ac.in](mailto:amarjitk@pu.ac.in)

### Table of Content

1. <sup>1</sup>H NMR spectrum of compound 4(a)
2. <sup>13</sup>C NMR spectrum of compound 4(a)
3. <sup>1</sup>H NMR spectrum of compound 4(b)
4. <sup>13</sup>C NMR spectrum of compound 4(b)
5. <sup>1</sup>H NMR spectrum of compound 4(c)
6. <sup>13</sup>C NMR spectrum of compound 4(c)
7. <sup>1</sup>H NMR spectrum of compound 4(d)
8. <sup>13</sup>C NMR spectrum of compound 4(d)
9. <sup>1</sup>H NMR spectrum of compound 4(e)
10. <sup>13</sup>C NMR spectrum of compound 4(e)
11. <sup>1</sup>H NMR spectrum of compound 5(a)
12. <sup>13</sup>C NMR spectrum of compound 5(a)

13. Mass spectrum of compound 5(a)
14.  $^1\text{H}$  NMR spectrum of compound 5(b)
15.  $^{13}\text{C}$  NMR spectrum of compound 5(b)
16. Mass spectrum of compound 5(b)
17.  $^1\text{H}$  NMR spectrum of compound 5(c)
18.  $^{13}\text{C}$  NMR spectrum of compound 5(c)
19. Mass spectrum of compound 5(c)
20.  $^1\text{H}$  NMR spectrum of compound 5(d)
21.  $^{13}\text{C}$  NMR spectrum of compound 5(d)
22. Mass spectrum of compound 5(d)
23.  $^1\text{H}$  NMR spectrum of compound 5(e)
24.  $^{13}\text{C}$  NMR spectrum of compound 5(e)
25. Mass spectrum of compound 5(e)
26. Bond lengths ( $\text{\AA}$ ) for 5 (c)
27. Bond Angles ( $^\circ$ ) for 5 (c)

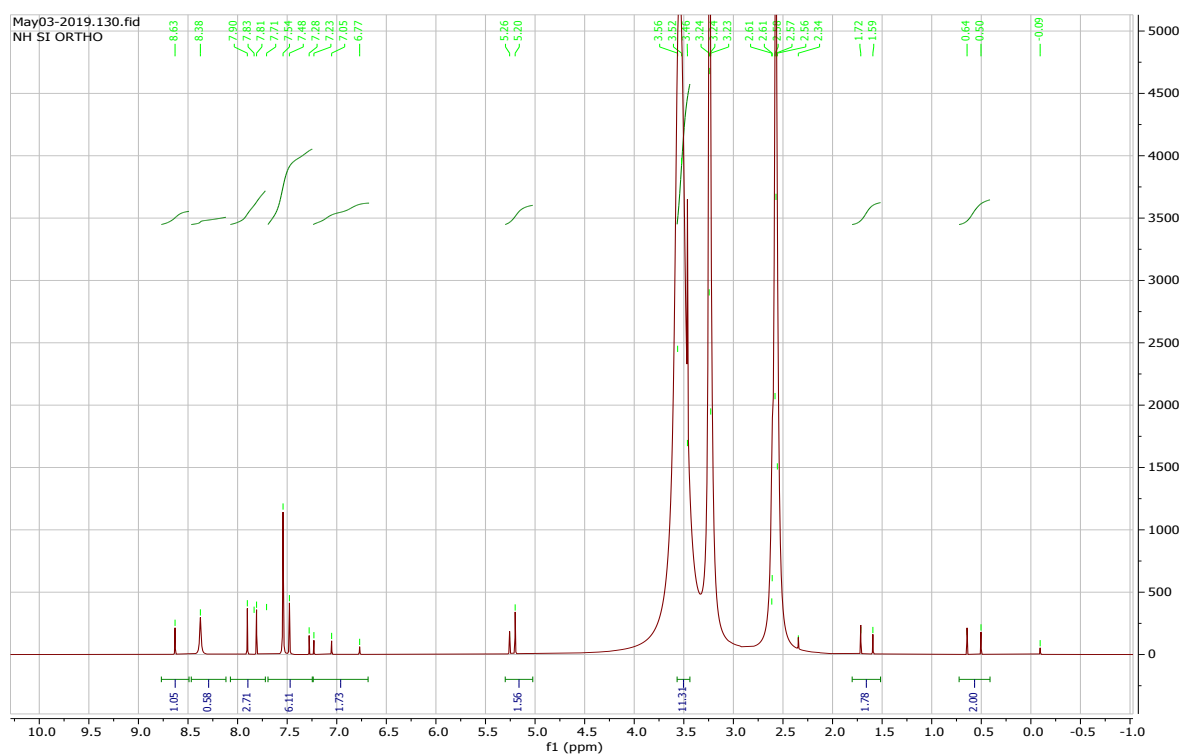

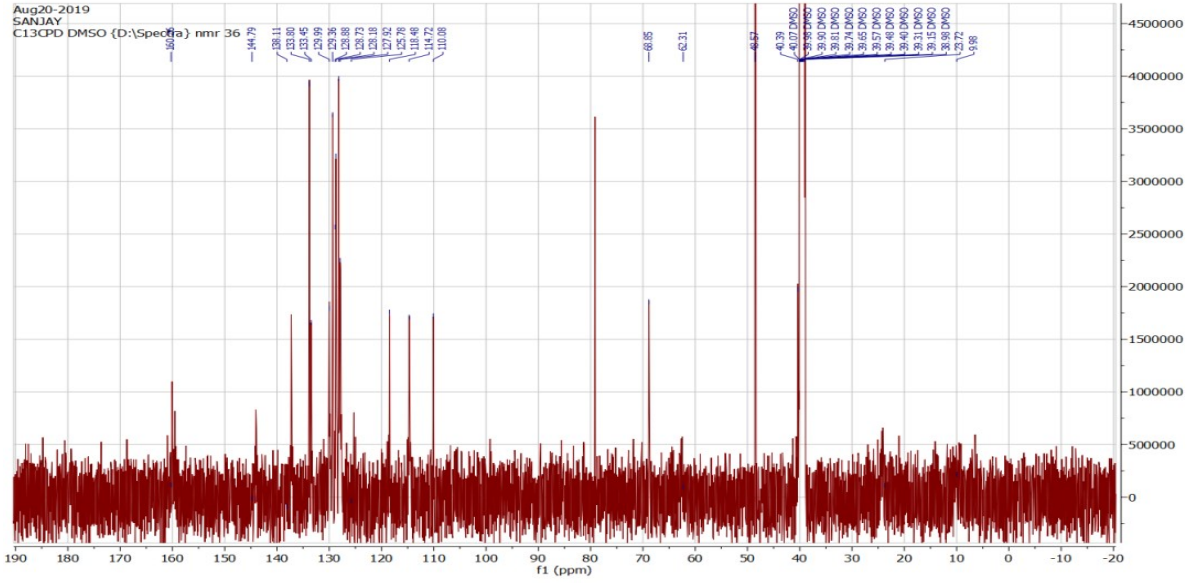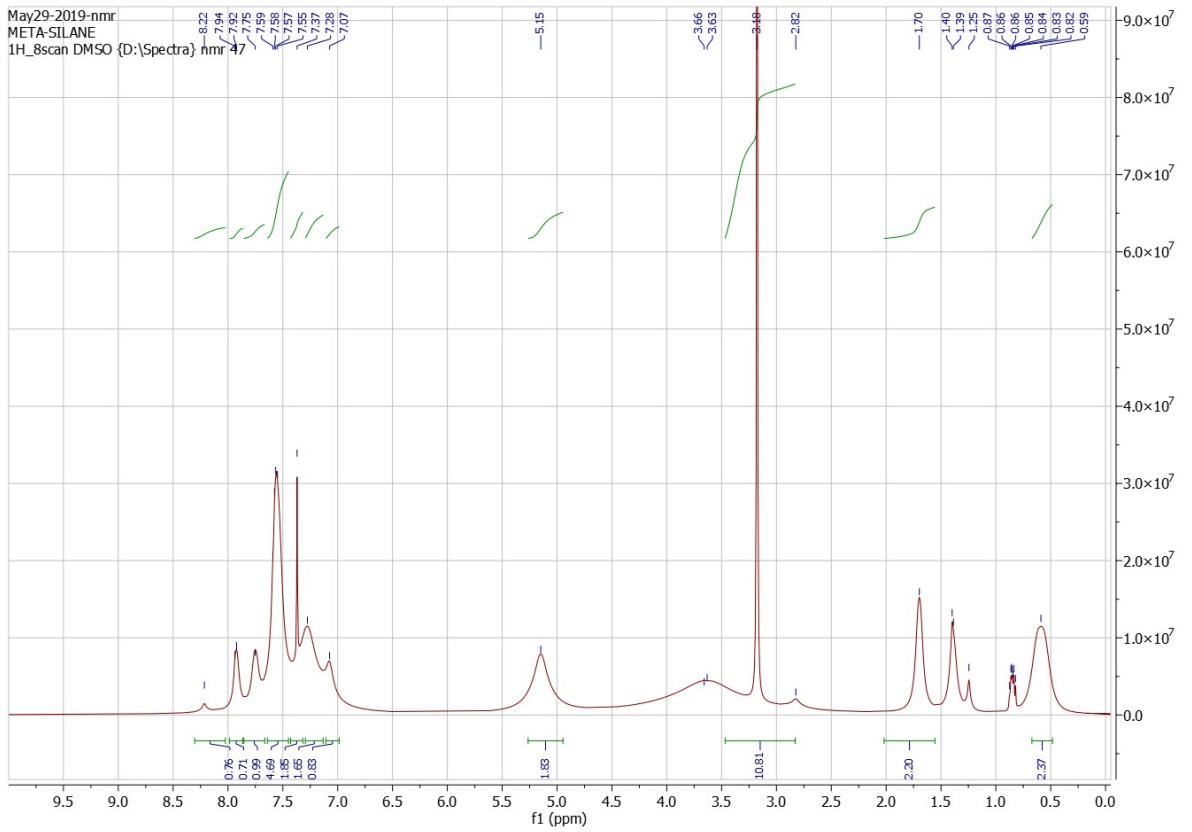

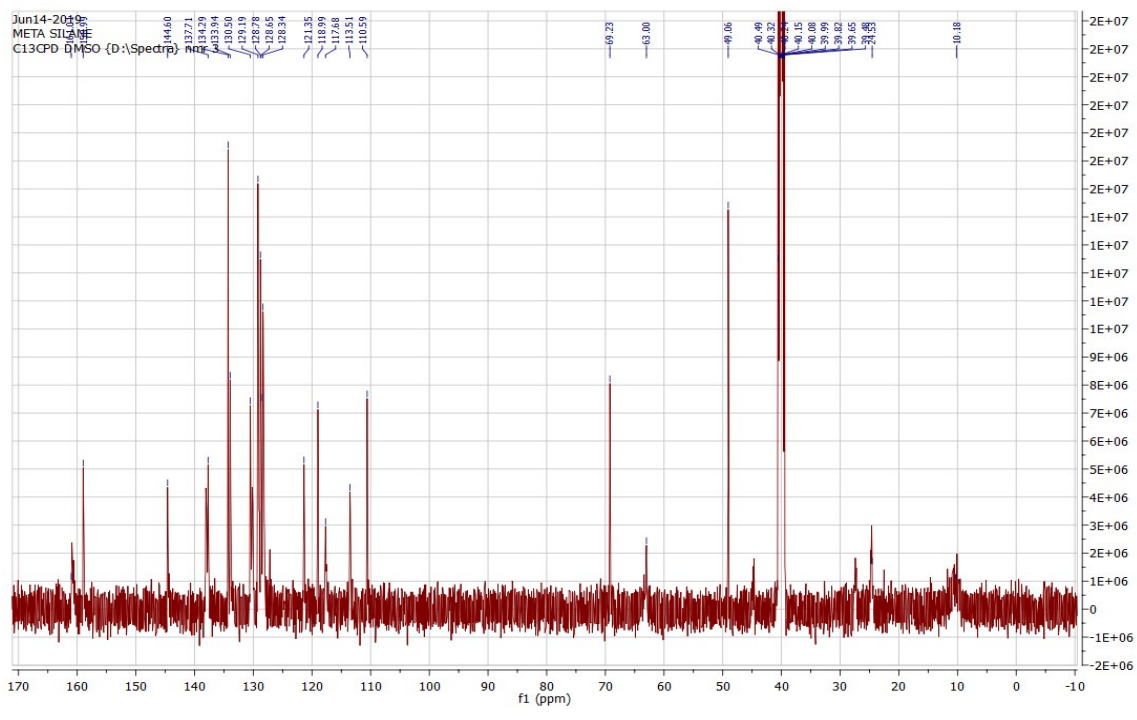

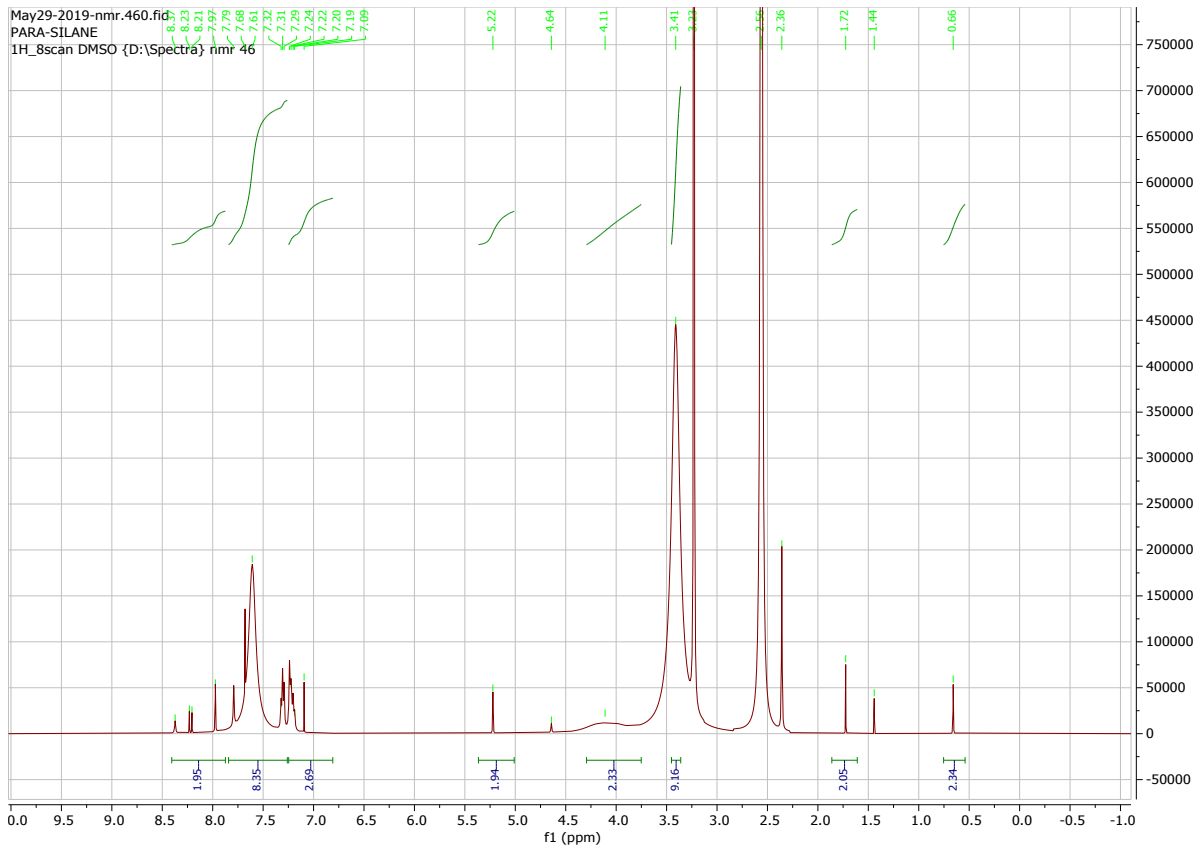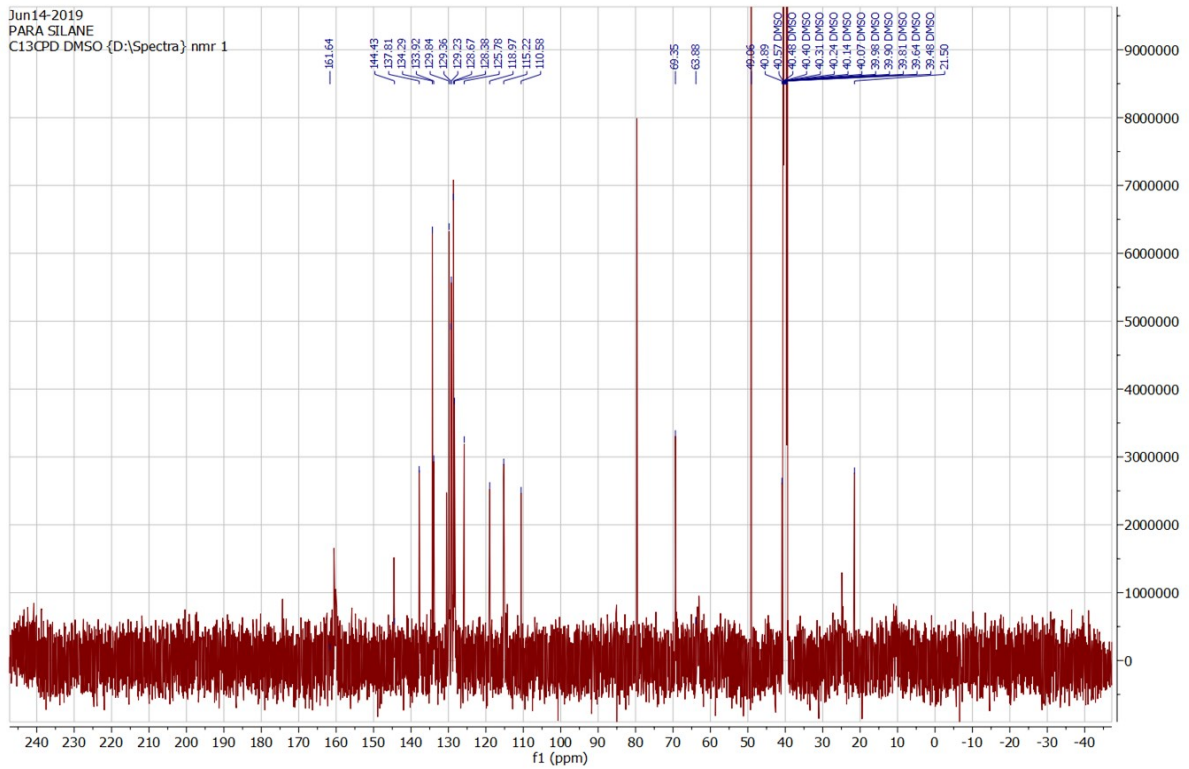

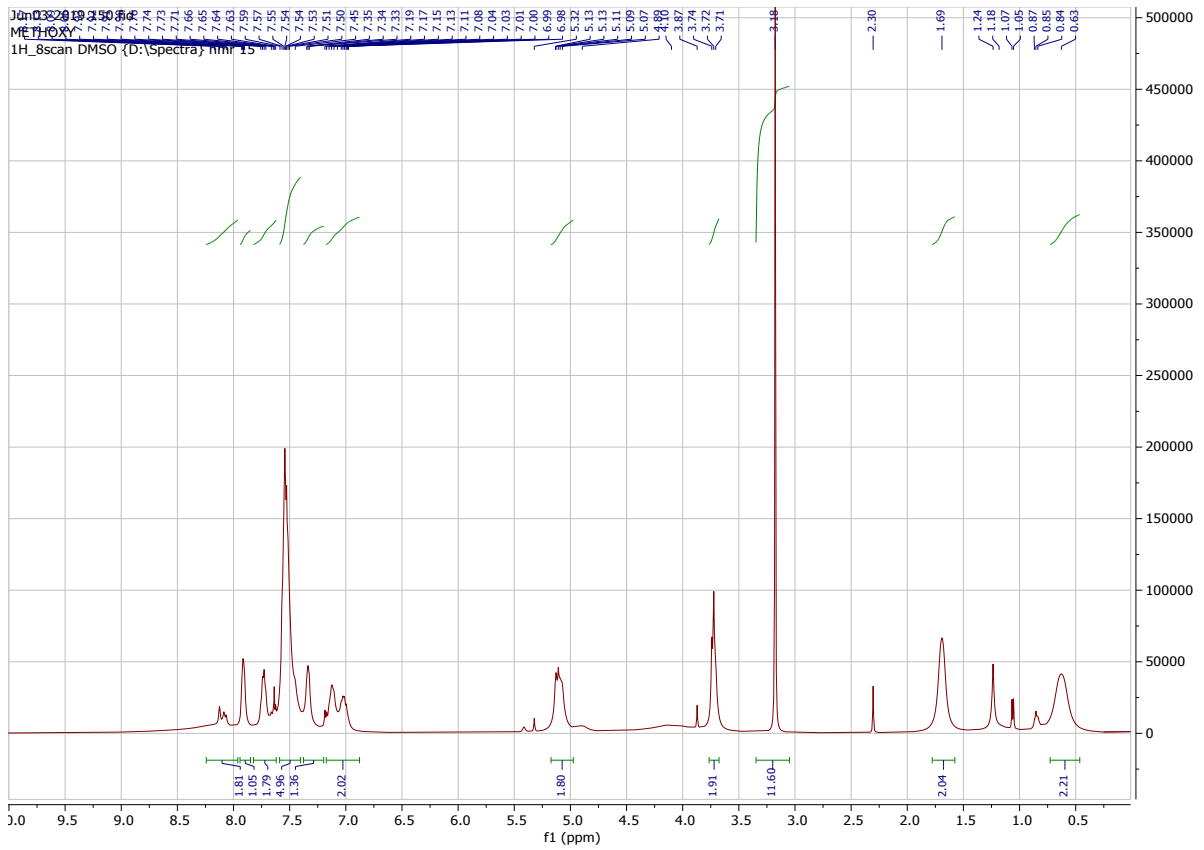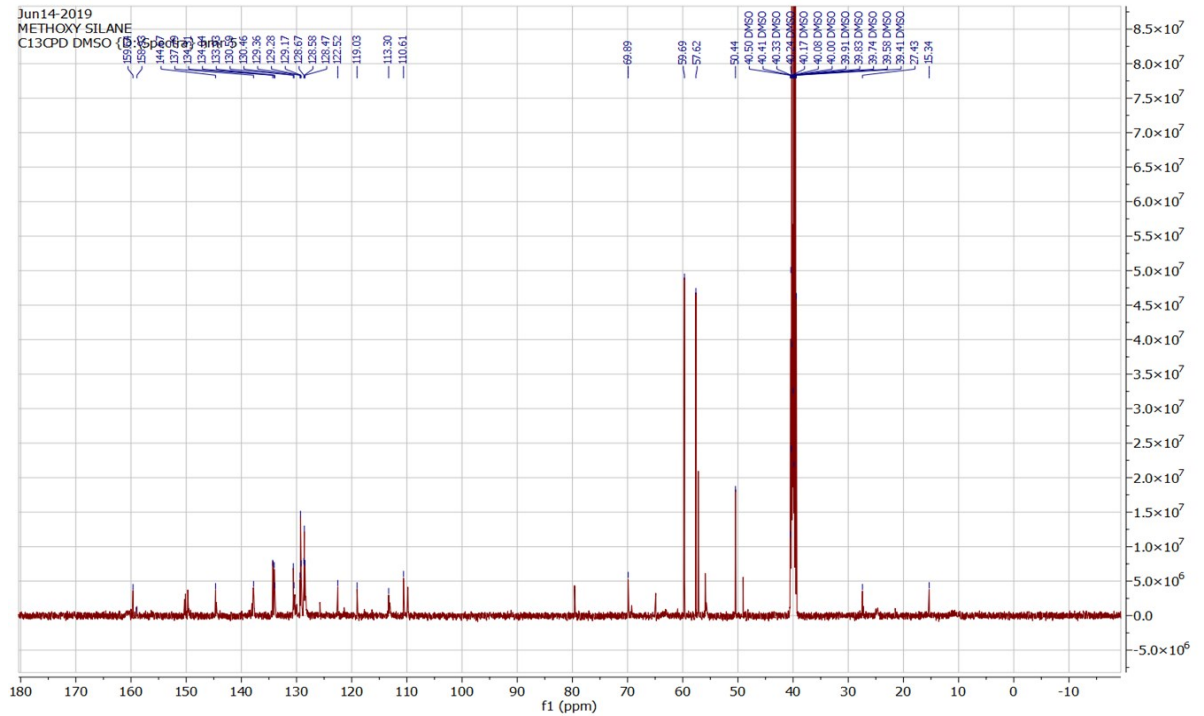

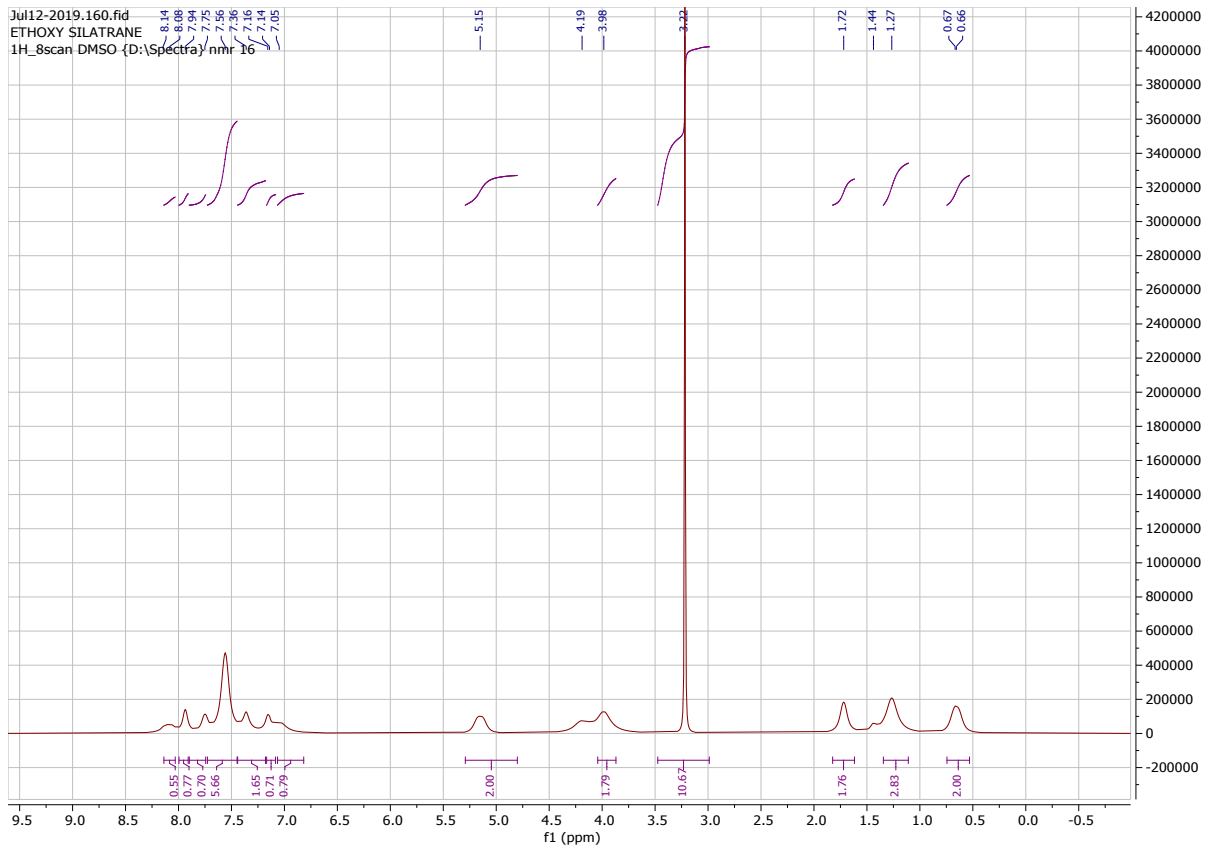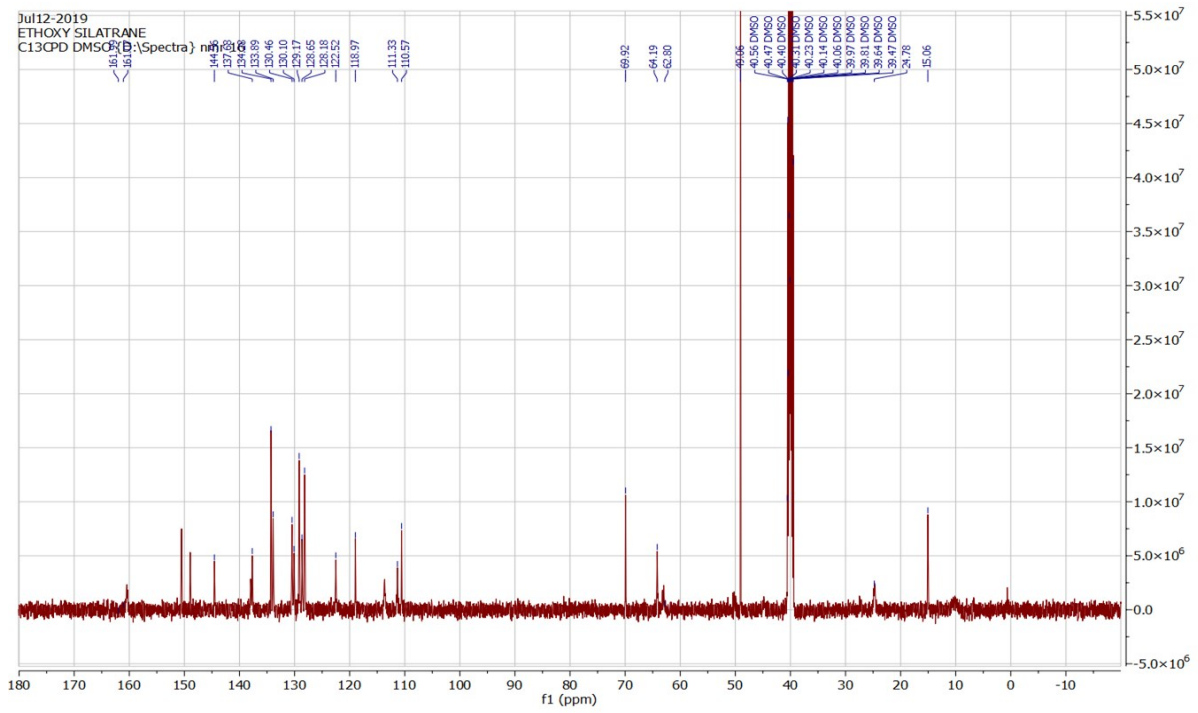

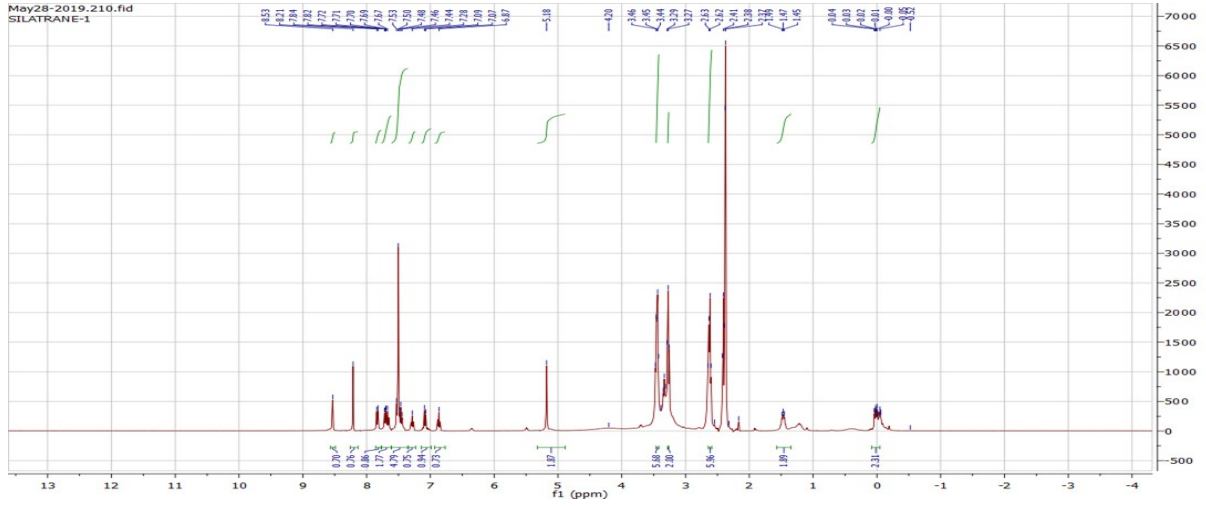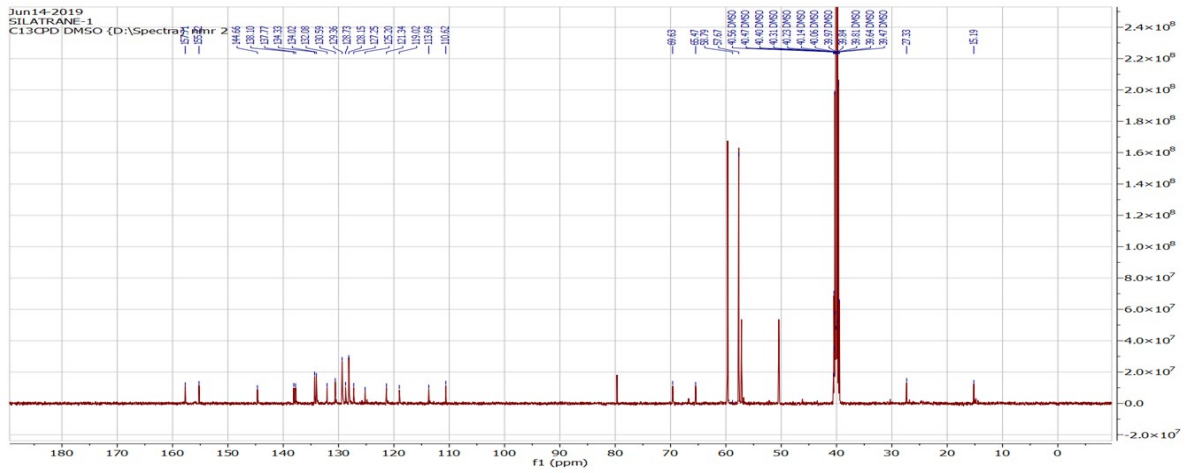





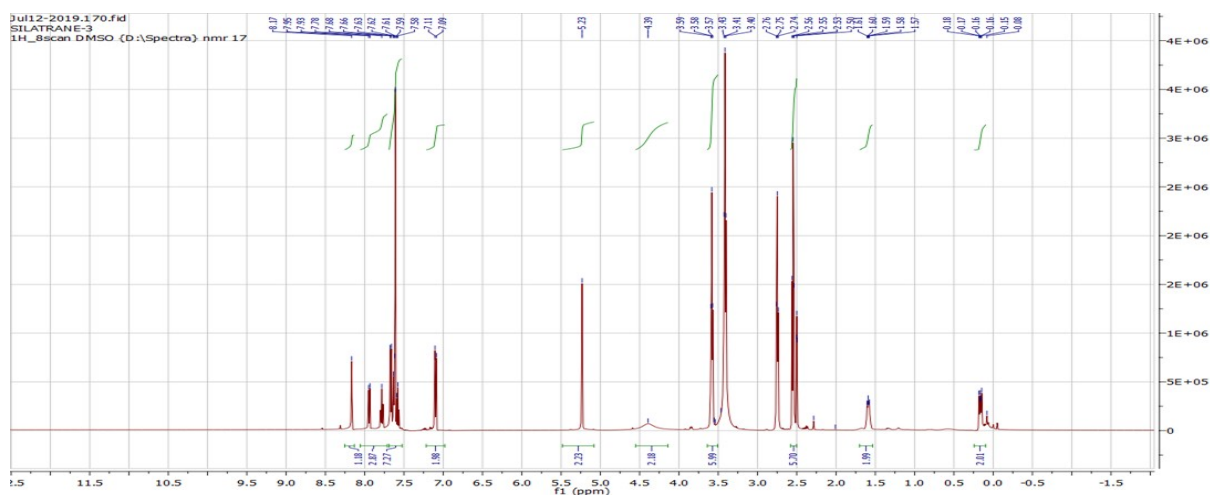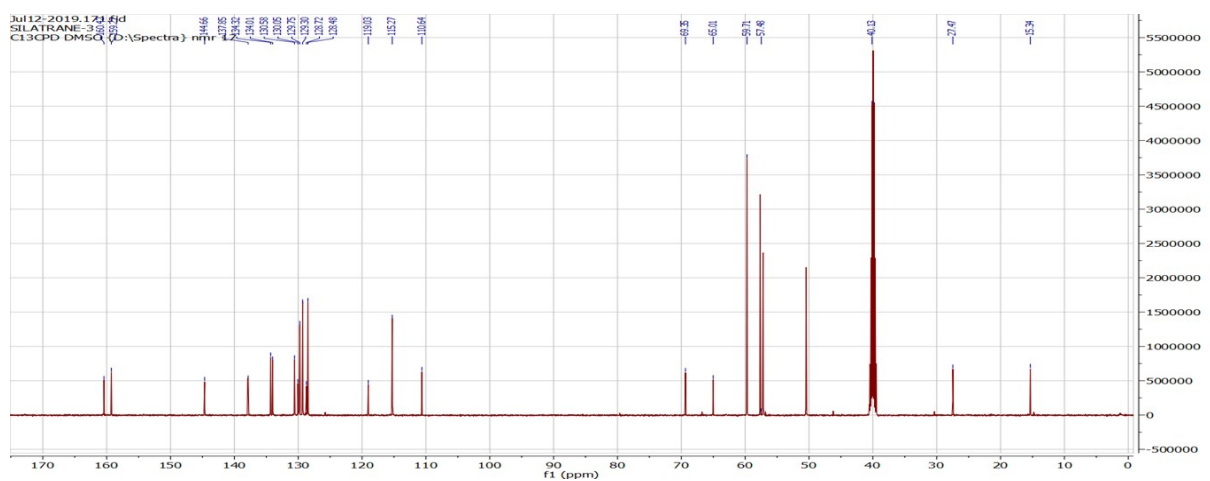

WATERS.Q-TOF MICROMASS (ESI-MS)  
SANJAY SILT-3 17 (0.451) Cm (3:17-25:44x2.000)

SAIF/CIL,PANJAB UNIVERSITY,CHANDIGARH  
TOF MS ES+  
4.57e3

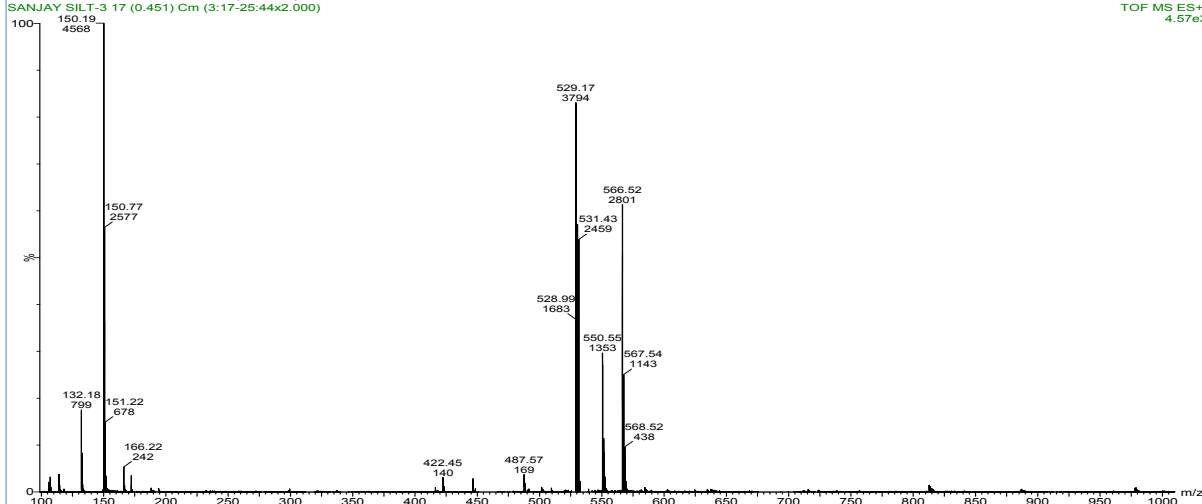

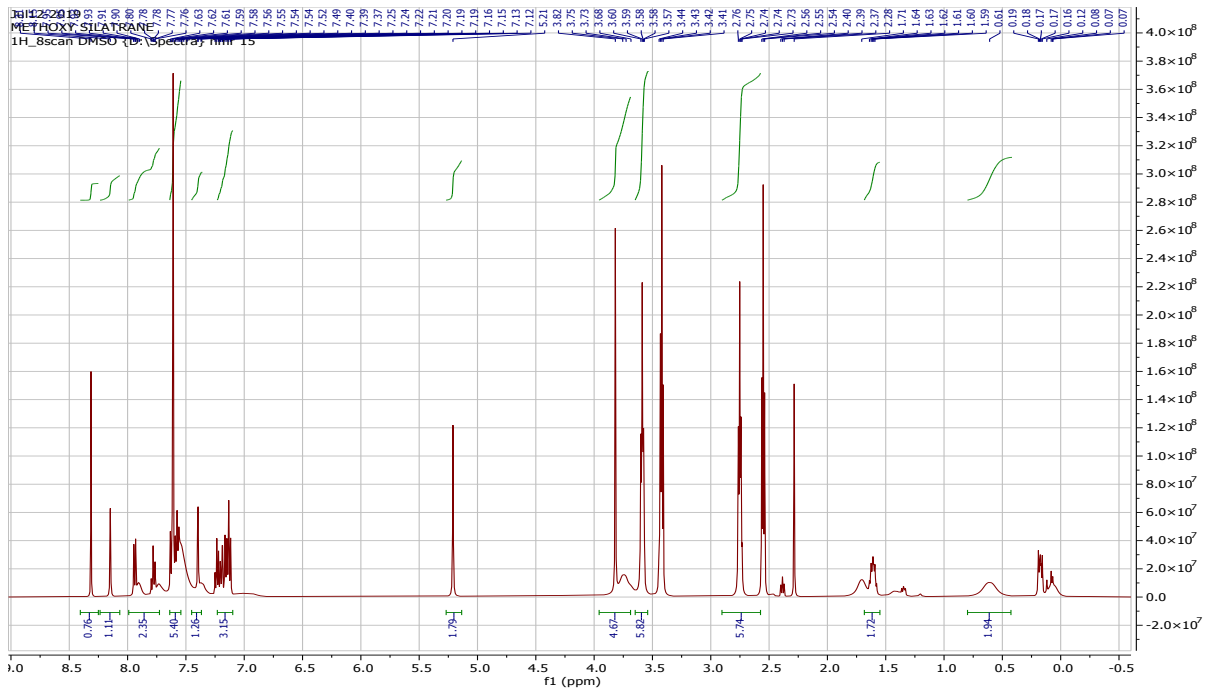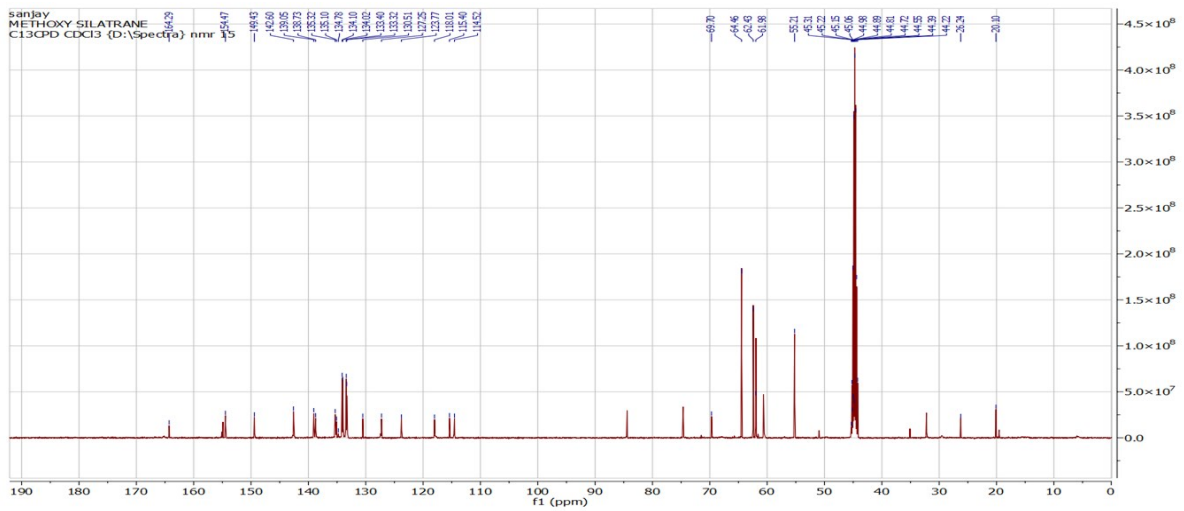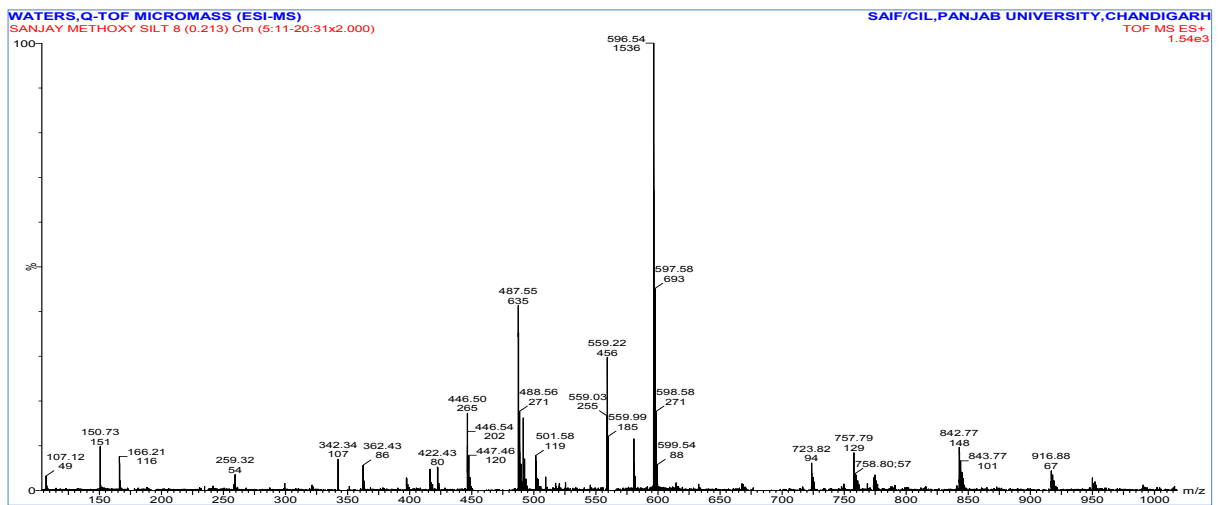

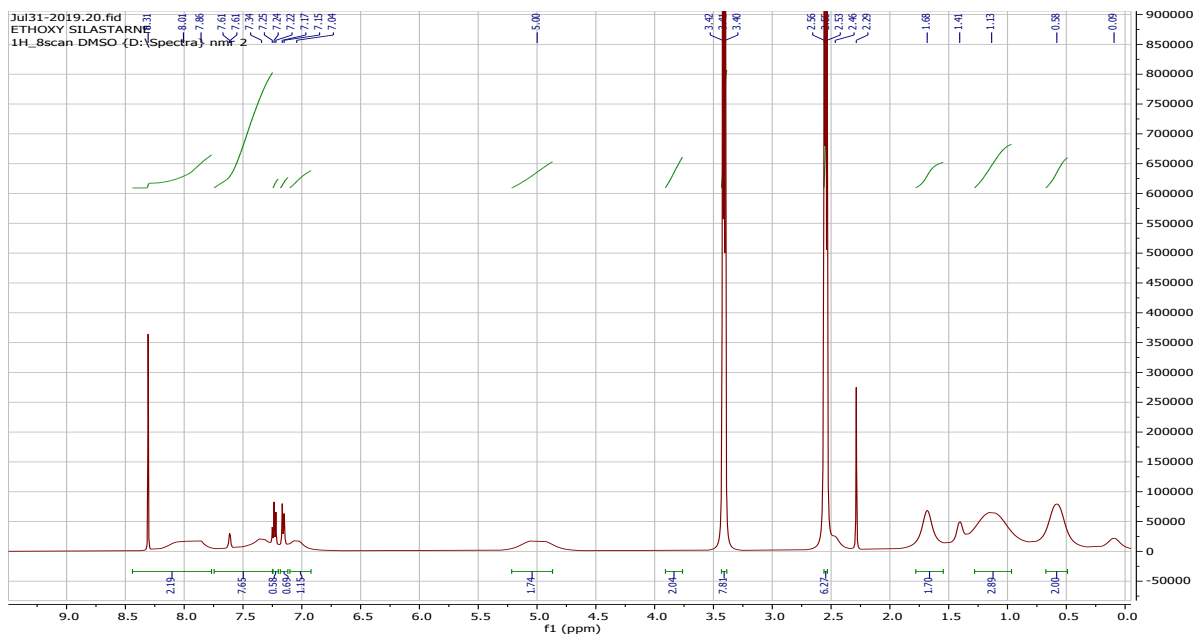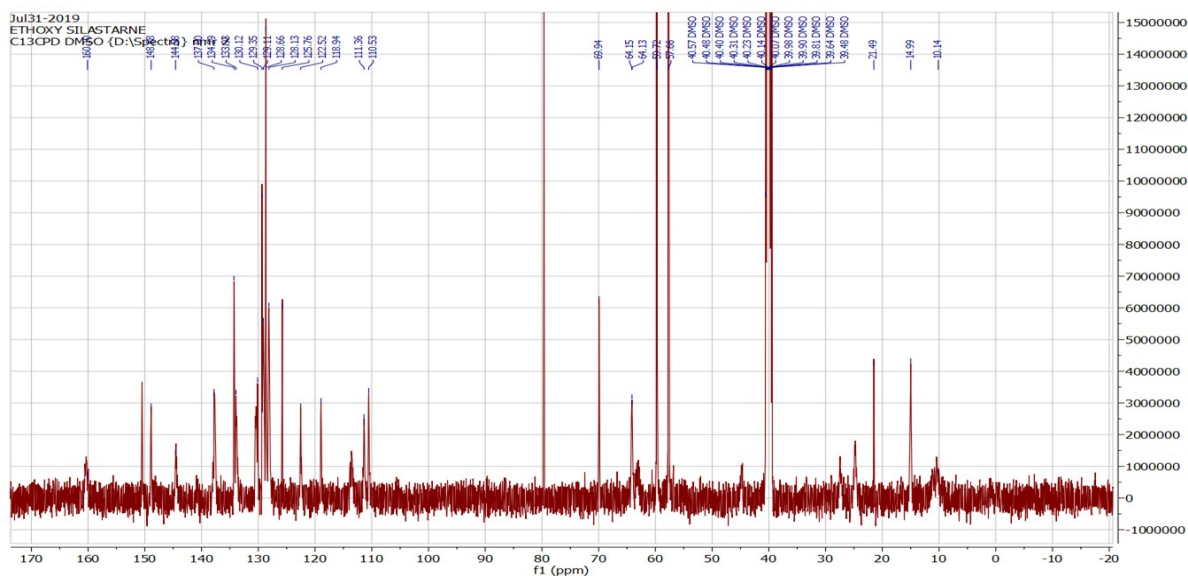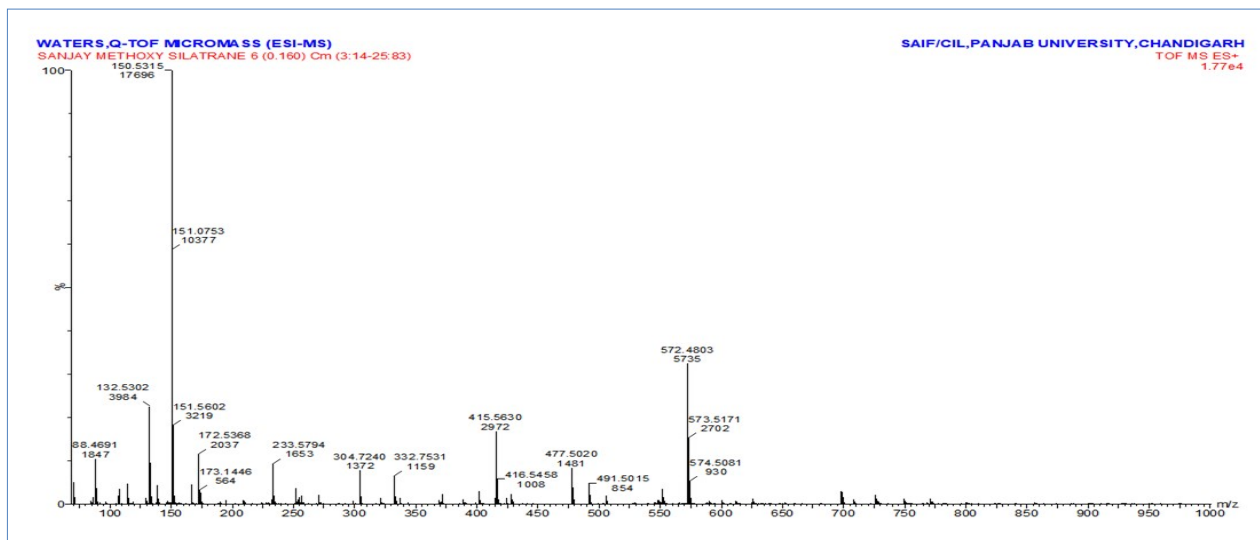

### Selected bond lengths (Å) for 5 (c)

Parameter X-ray Parameter X-ray parameter

|         |             |         |            |
|---------|-------------|---------|------------|
| Si1 O3  | 1.6425 (18) | C16-C15 | 1.373 (3)  |
| Si1 O1  | 1.647 (2)   | C24 C29 | 1.381 (4)  |
| Si1 O2  | 1.656 (2)   | C24 C21 | 1.499 (3)  |
| Si1 N1  | 2.182 (3)   | C24 C25 | 1.385 (4)  |
| Si1 C7  | 1.866 (3)   | C13 C12 | 1.388 (3)  |
| O4 C14  | 1.366 (3)   | C29 C28 | 1.396 (3)  |
| O4 C17  | 1.405 (3)   | C29 C30 | 1.451 (4)  |
| O3 C6   | 1.407 (3)   | C28 C27 | 1.365 (4)  |
| N2 C10  | 1.251 (3)   | C22 C21 | 1.379 (3)  |
| N2 C9   | 1.463 (3)   | C2 C23  | 1.386 (3)  |
| O1 C1   | 1.411 (4)   | C27 C26 | 1.370 (4)  |
| O2 C4   | 1.404 (4)   | C21 C20 | 1.387 (4)  |
| N1 C2A  | 1.461 (6)   | C18 C23 | 1.382 (4)  |
| N1 C2B  | 1.530 (10)  | C18 C17 | 1.503 (3)  |
| N1 C3A  | 1.509 (6)   | C18 C19 | 1.368 (4)  |
| N1 C3B  | 1.391 (8)   | C25 C26 | 1.376 (3)  |
| N1 C5A  | 1.459 (10)  | N3 C30  | 1.137 (4)  |
| N1 C5B  | 1.445 (9)   | C20 C19 | 1.379 (4)  |
| C11 C10 | 1.473 (3)   | C4 C3A  | 1.501 (6)  |
| C11 C16 | 1.389 (3)   | C4 C3B  | 1.635 (11) |
| C11 C12 | 1.373 (3)   | C6 C5A  | 1.593 (11) |
| C14 C13 | 1.377 (4)   | C6 C5B  | 1.400 (12) |
| C14 C15 | 1.387 (4)   | C1 C2A  | 1.592 (7)  |
| C8 C9   | 1.510 (4)   | C1 C2B  | 1.461 (8)  |
| C8 C7   | 1.511 (4)   |         |            |

---

### **Bond Angles for 5c**

Atom AtomAtom Angle/

Atom Atom Atom Angle

|            |           |           |           |
|------------|-----------|-----------|-----------|
| C5BN1 Si1  | 103.3 (4) | O2 C4 C3A | 110.6 (3) |
| C5BN1 C2B  | 107.0 (6) | O2 C4 C3B | 109.5 (4) |
| C16 C11C10 | 122.0 (2) | O3 C6 C5A | 112.0 (4) |
| C12 C11C10 | 120.1 (2) | C5BC6 O3  | 111.8 (4) |
| C12 C11C16 | 117.9 (2) | O1 C1 C2A | 108.3 (3) |
| N2 C10C11  | 124.4 (2) | O1 C1 C2B | 111.8 (4) |
| O4 C14C13  | 124.7 (2) | N1 C2AC1  | 103.0 (4) |
| O4 C14C15  | 116.1 (2) | C1 C2BN1  | 106.1 (5) |
| C13 C14C15 | 119.3 (2) | C4 C3AN1  | 104.0 (4) |
| C9 C8 C7   | 114.2 (2) | N1 C3BC4  | 102.9 (6) |
| C15 C16C11 | 121.0 (2) | N1 C5AC6  | 101.7 (6) |
| C29 C24C21 | 123.3 (2) | C6 C5BN1  | 112.7 (7) |
| C29 C24C25 | 117.2 (2) |           |           |

---
