# Supplementary material for: The first report of X-ray characterized organosilatrane-based receptors for the electrochemical analysis of Al3+ ions
Source: Royal Society of Chemistry journal article supplement (doi:10.1039/d1nj02893f), 2021-01-01
Supplement: d1nj02893f2.pdf [file d1nj02893f2.pdf]

## First report of X-ray characterized Organosilatrane based receptor for electrochemical analysis of Al<sup>3+</sup> ions

Gurjaspreet Singh<sup>a\*</sup>, Sanjay Sharma<sup>a</sup>, Akshpreet Singh<sup>b</sup>, Ranjeet Kaur<sup>a</sup>, Pawan<sup>a</sup>, Mohit<sup>a</sup>, Shweta Rana<sup>a</sup>, Subash Chandra Sahoo<sup>a</sup>, AmarjitKaur<sup>a\*</sup>

<sup>a</sup>Department of Chemistry, Panjab University, Chandigarh, 160014, India

<sup>b</sup>Department of Chemistry, DAV College, Sector-10, Chandigarh, India-160011

\*Corresponding Author

1. Prof. Gurjaspreet Singh

Department of Chemistry and Centre of Advanced Studies

Panjab University, Chandigarh, India

Email: [gjpsingh@pu.ac.in](mailto:gjpsingh@pu.ac.in)

2. Dr. Amarjit Kaur

Department of Chemistry and Centre of Advanced Studies

Panjab University, Chandigarh, India

Email: [amarjitk@pu.ac.in](mailto:amarjitk@pu.ac.in)

### Table of Content

1. <sup>1</sup>H NMR spectrum of compound 4(a)
2. <sup>13</sup>C NMR spectrum of compound 4(a)
3. <sup>1</sup>H NMR spectrum of compound 4(b)
4. <sup>13</sup>C NMR spectrum of compound 4(b)
5. <sup>1</sup>H NMR spectrum of compound 4(c)
6. <sup>13</sup>C NMR spectrum of compound 4(c)
7. <sup>1</sup>H NMR spectrum of compound 4(d)
8. <sup>13</sup>C NMR spectrum of compound 4(d)
9. <sup>1</sup>H NMR spectrum of compound 4(e)
10. <sup>13</sup>C NMR spectrum of compound 4(e)
11. <sup>1</sup>H NMR spectrum of compound 5(a)
12. <sup>13</sup>C NMR spectrum of compound 5(a)

13. Mass spectrum of compound 5(a)
14.  $^1\text{H}$  NMR spectrum of compound 5(b)
15.  $^{13}\text{C}$  NMR spectrum of compound 5(b)
16. Mass spectrum of compound 5(b)
17.  $^1\text{H}$  NMR spectrum of compound 5(c)
18.  $^{13}\text{C}$  NMR spectrum of compound 5(c)
19. Mass spectrum of compound 5(c)
20.  $^1\text{H}$  NMR spectrum of compound 5(d)
21.  $^{13}\text{C}$  NMR spectrum of compound 5(d)
22. Mass spectrum of compound 5(d)
23.  $^1\text{H}$  NMR spectrum of compound 5(e)
24.  $^{13}\text{C}$  NMR spectrum of compound 5(e)
25. Mass spectrum of compound 5(e)
26. Bond lengths ( $\text{\AA}$ ) for 5 (c)
27. Bond Angles ( $^\circ$ ) for 5 (c)

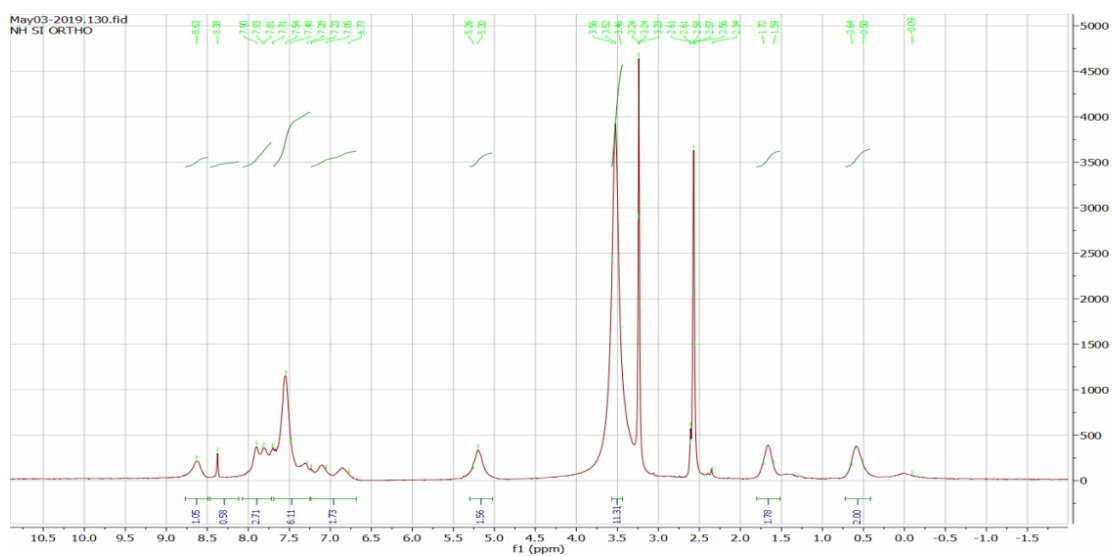

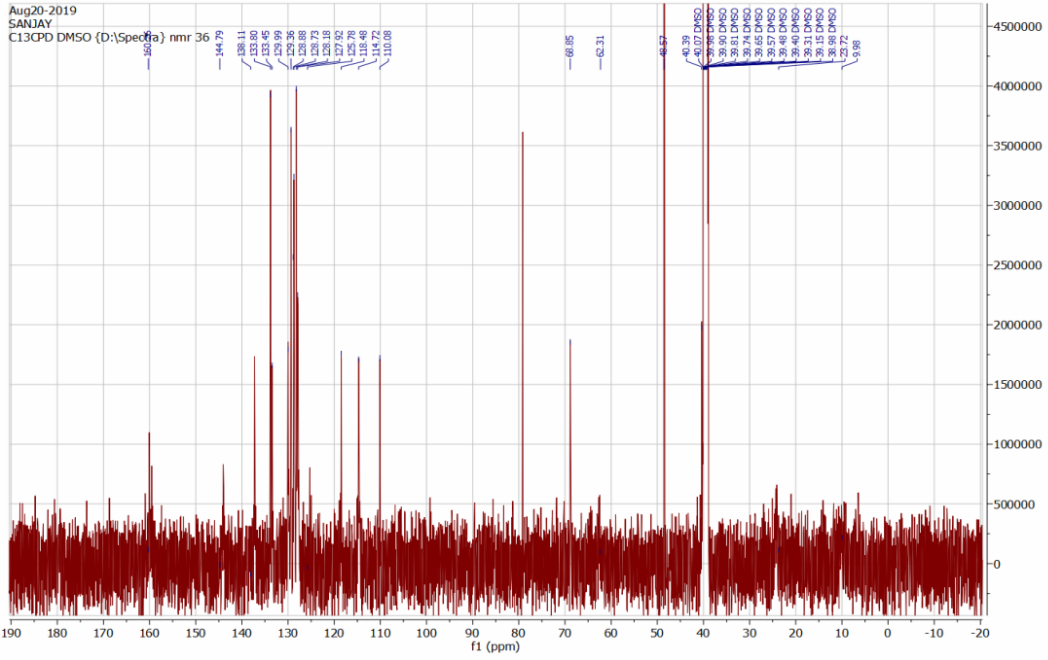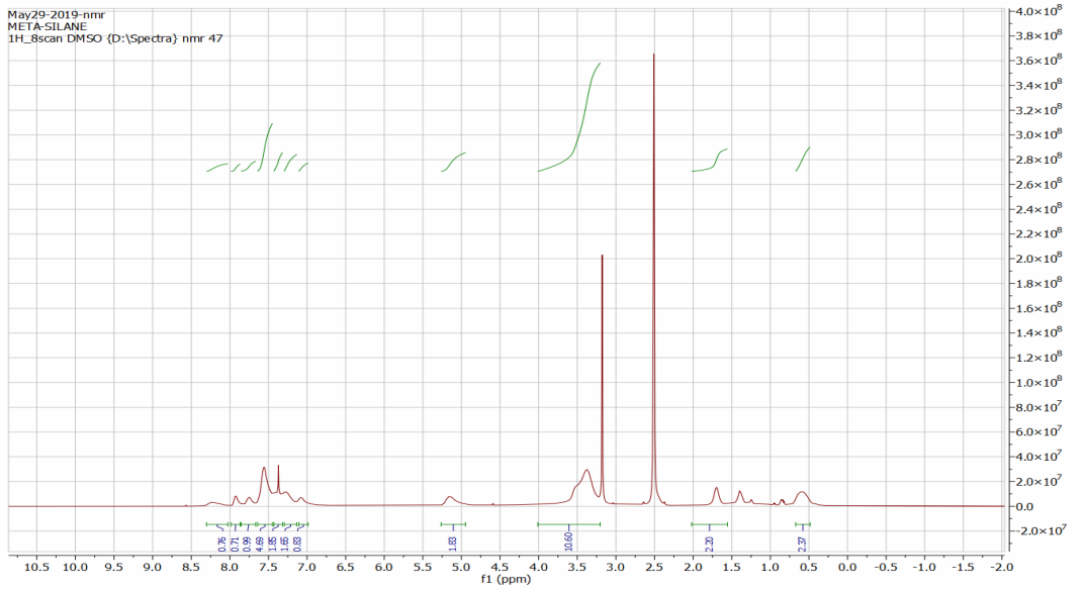

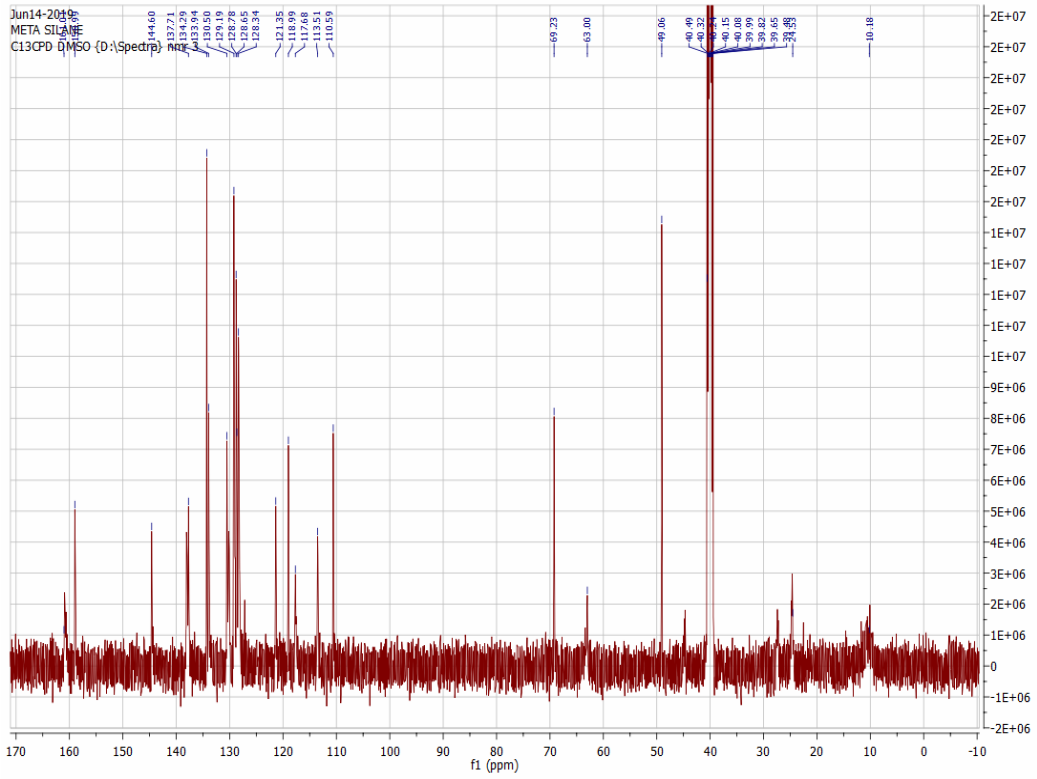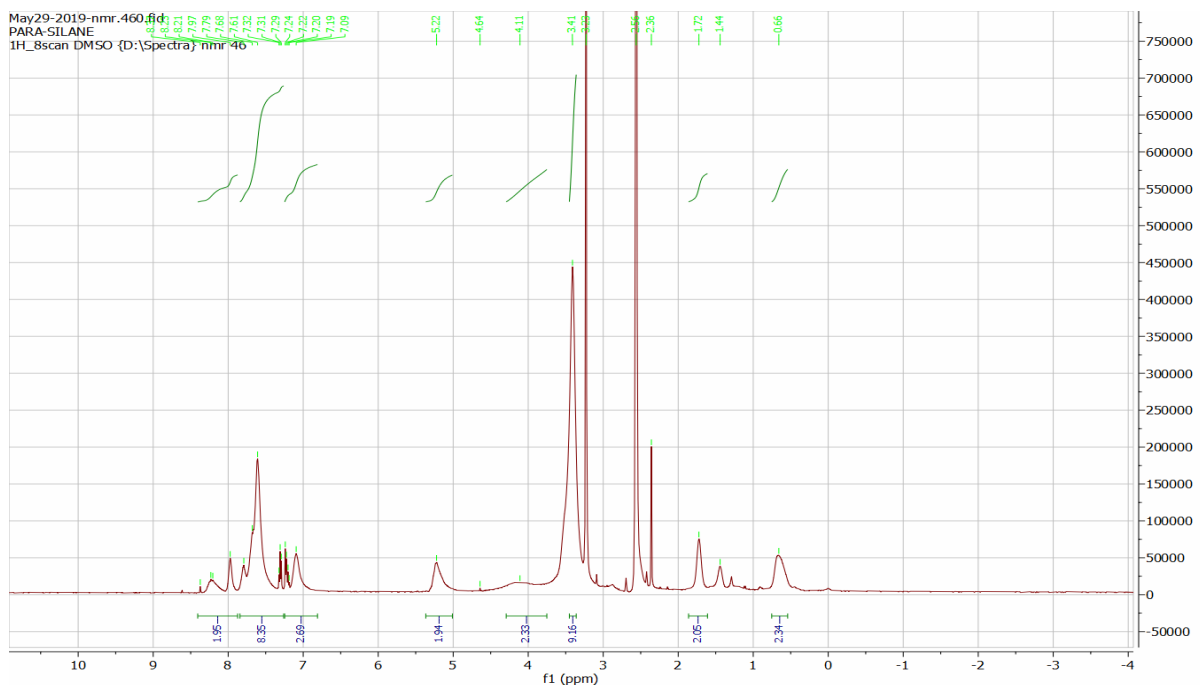

Jun14-2019  
 PARA SILANE  
 C13CPD DMSO {D:\Spectra} nmr 1

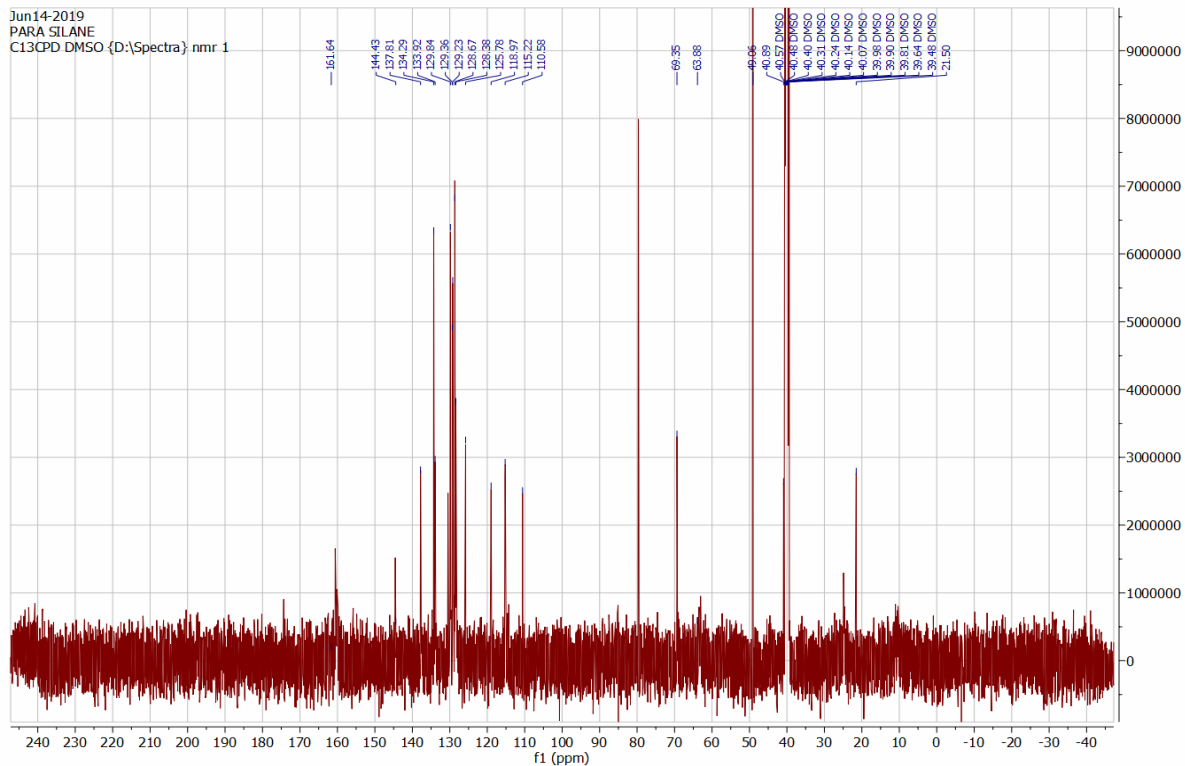

Jun03-2019.150.fid  
 METHOXY  
 1H\_8scan DMSO {D:\Spectra} nmr 15

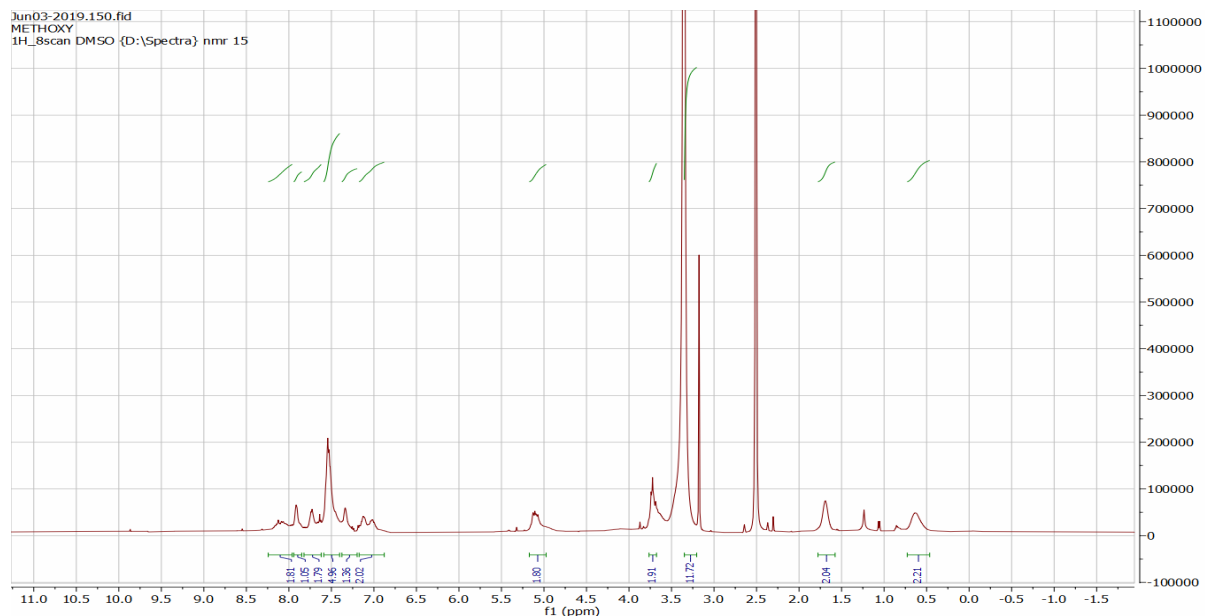

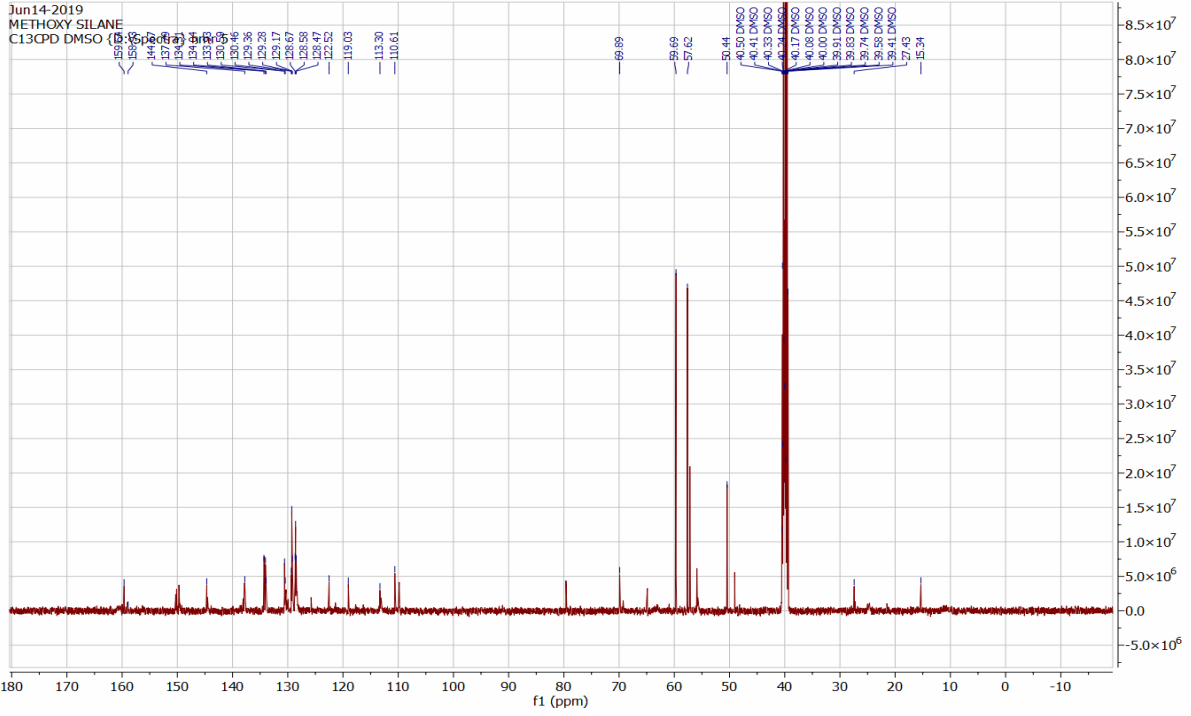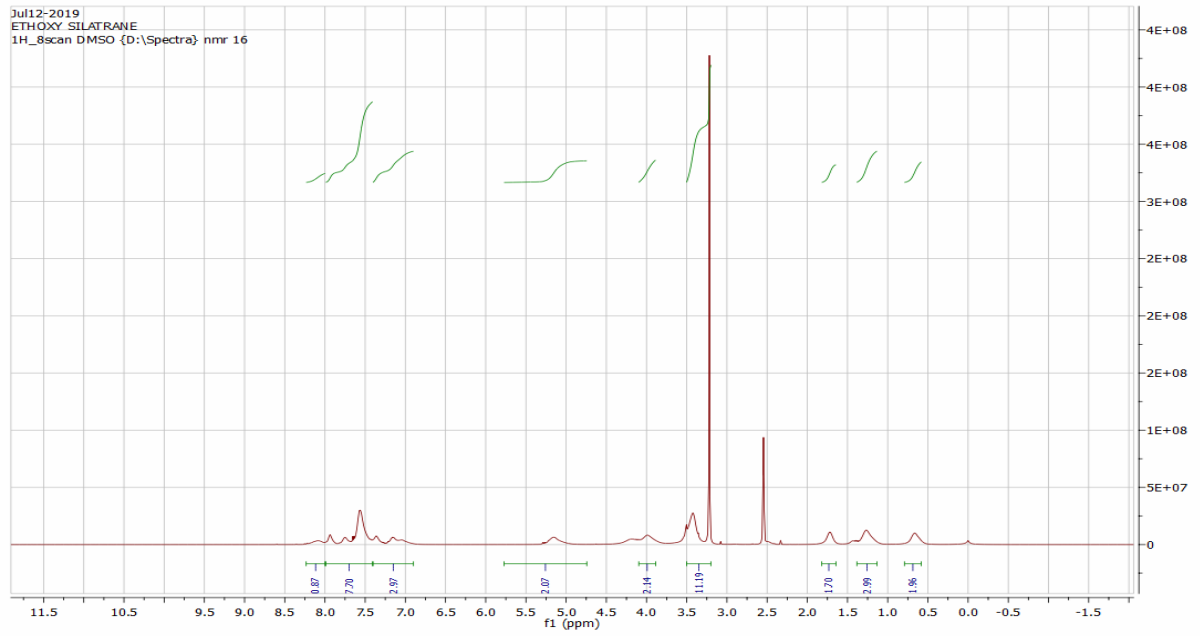

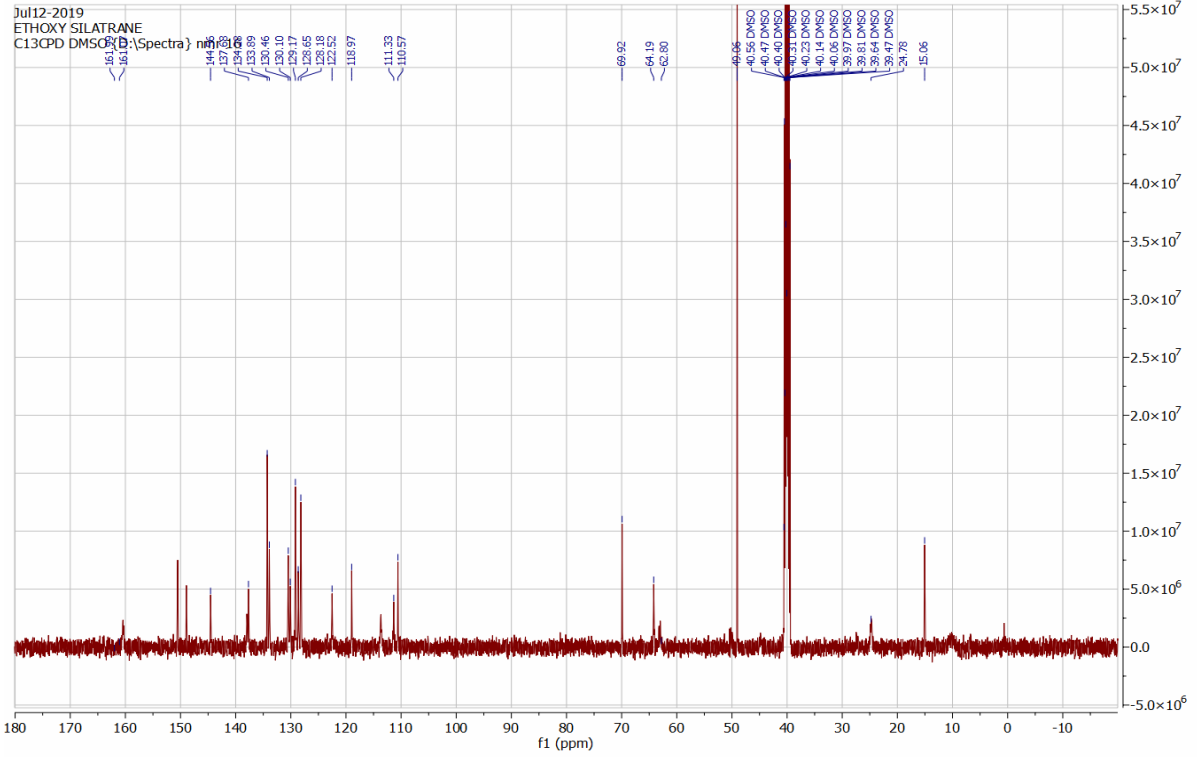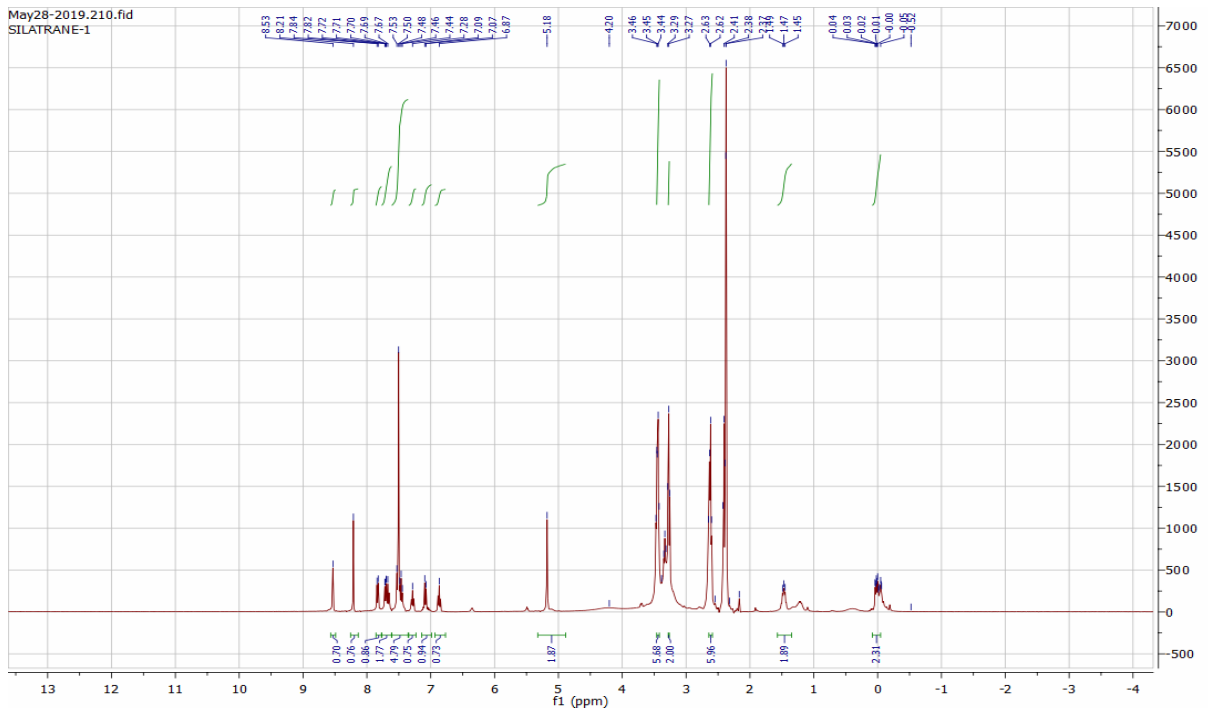

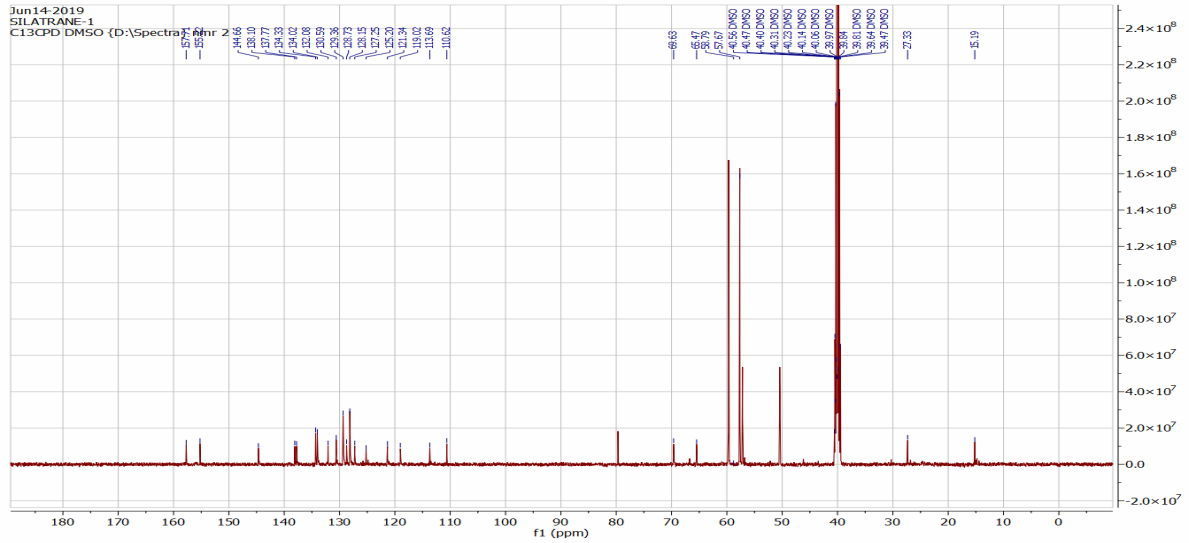

**WATERS, Q-TOF MICROMASS (ESI-MS)**

SANJAY ORTHOSILANE 22 (0.408) Cm (1:23)

SAIF/CIL, PANJAB UNIVERSITY, CHANDIGARH

TOF MS ES+ 1.02e4

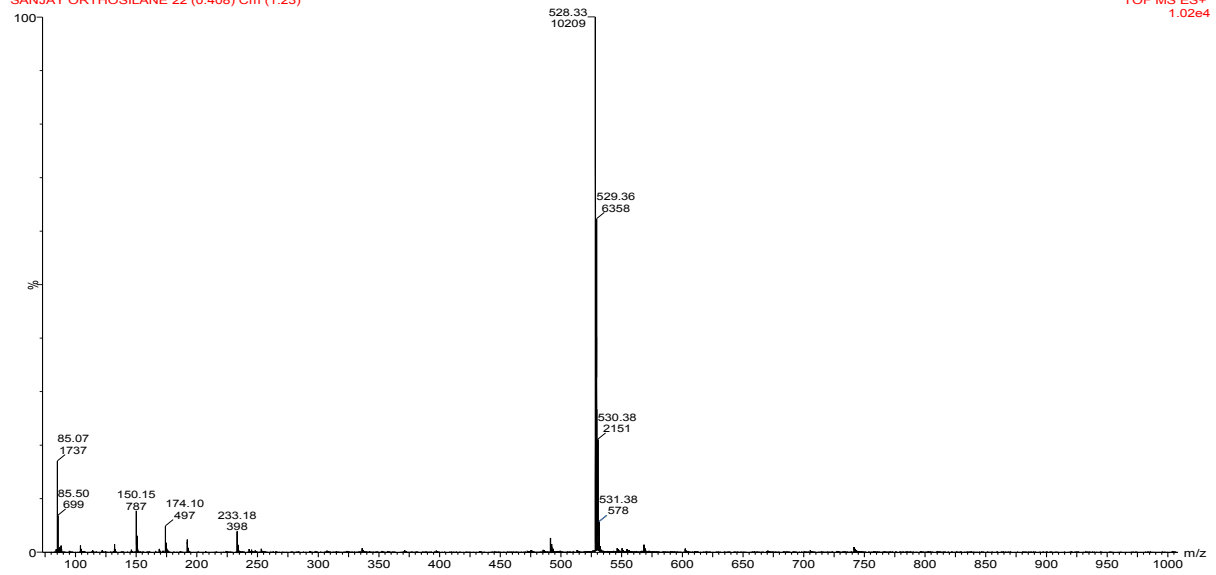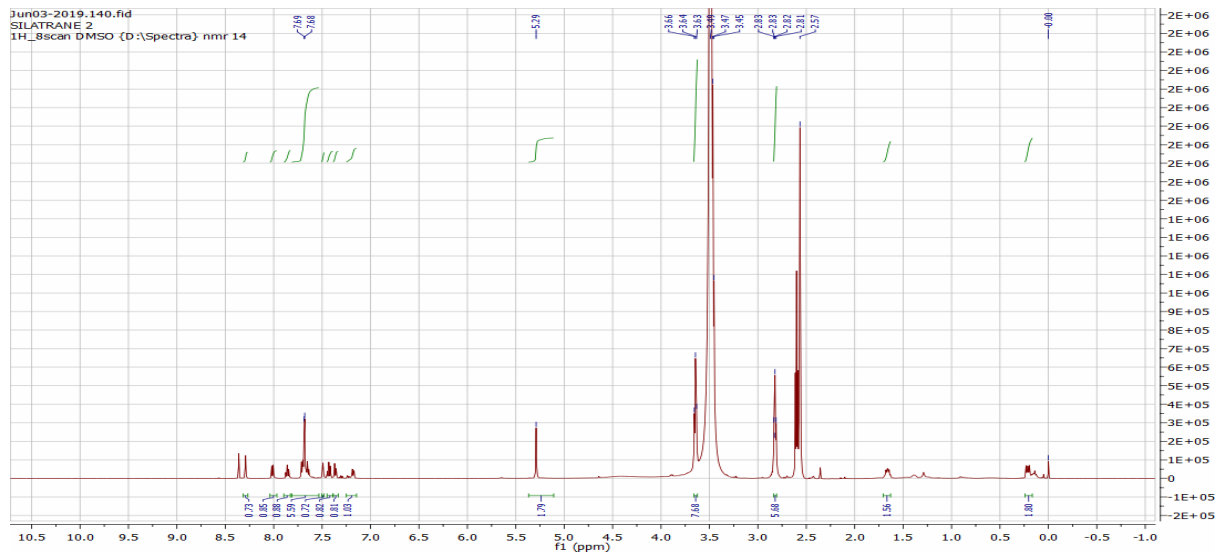





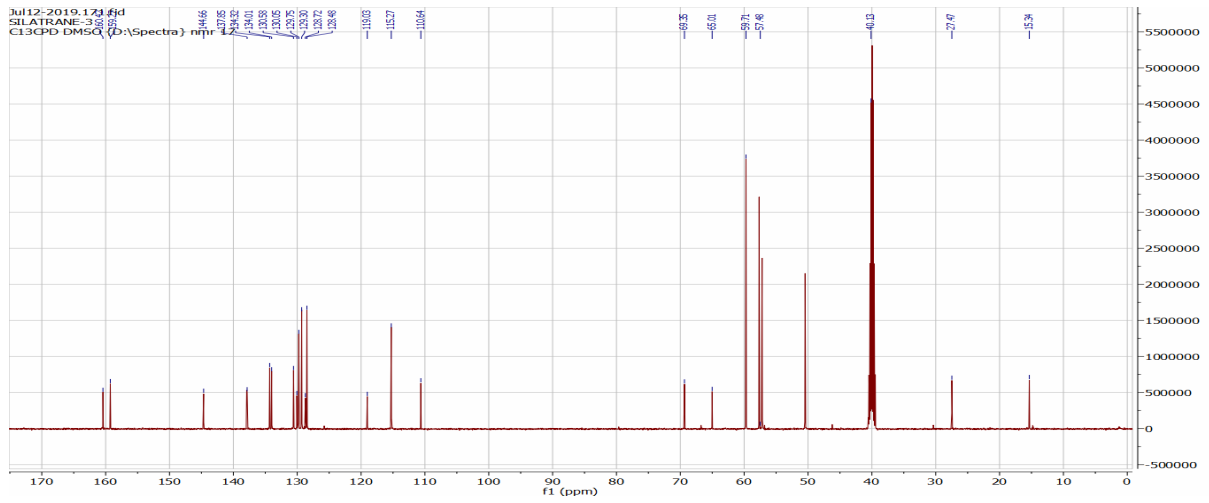

WATERS Q-TOF MICROMASS (ESI-MS)  
 SANJAY SILT-3 17 (0.451) Cm (3:17-25:44x2.000)

SAIF/CIL, PANJAB UNIVERSITY, CHANDIGARH  
 TOF MS ES+  
 4.57e3

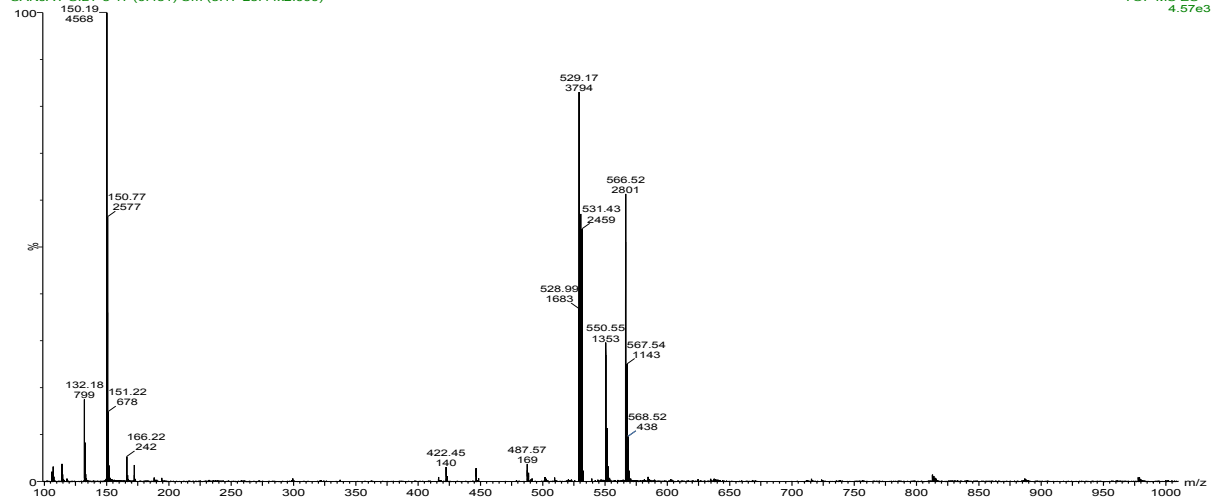

Jul12-2019  
 METHOXY SILATRANE  
 1H\_8scan DMSO (D:\Spectra) nmr 15

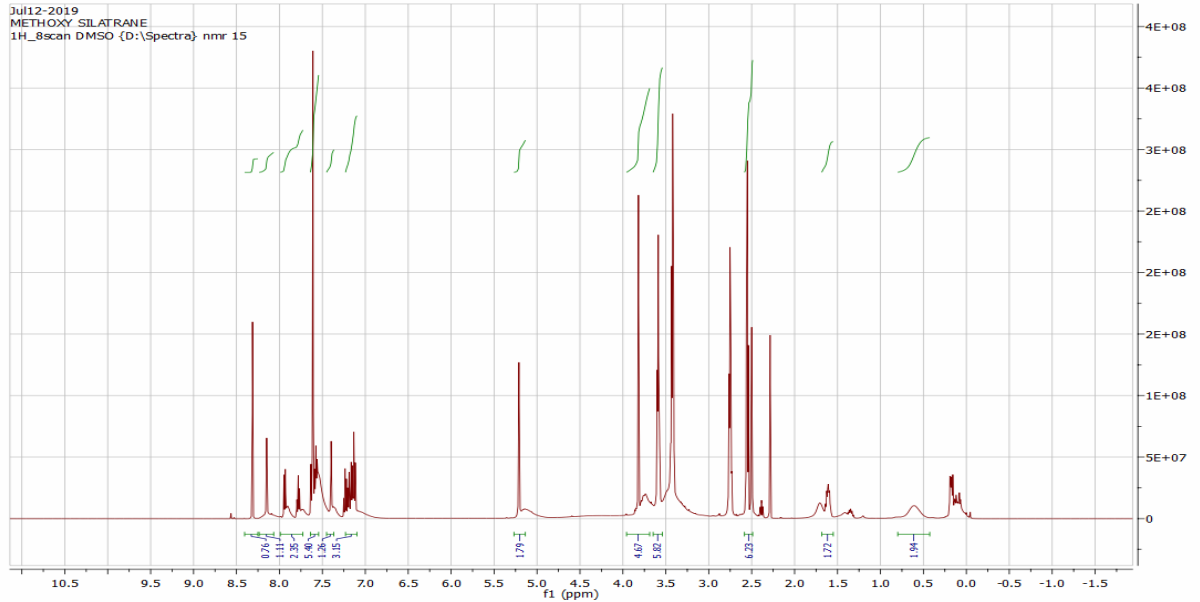

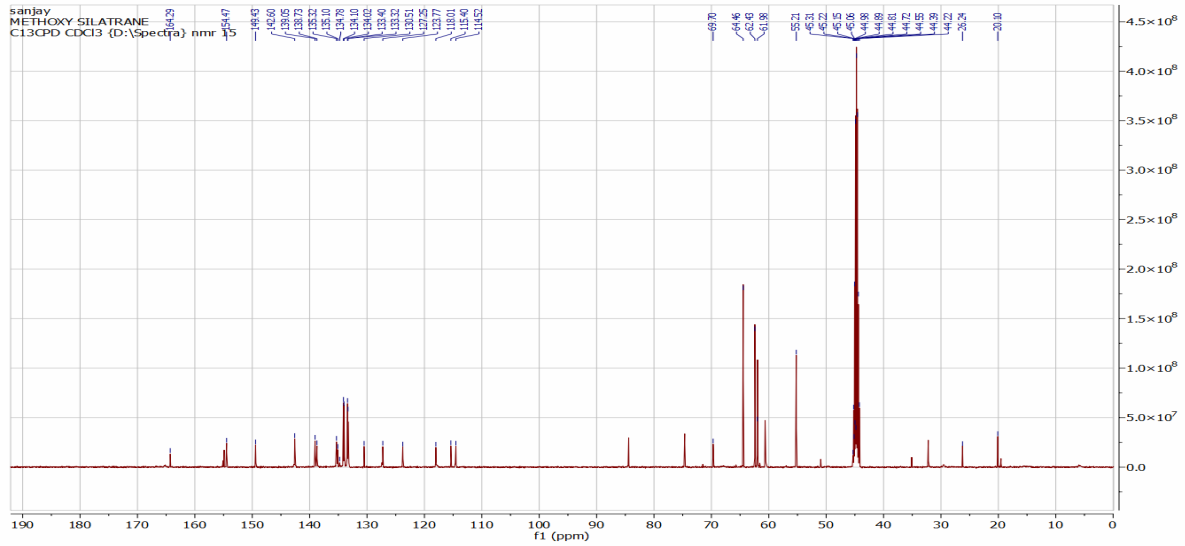

WATERS, Q-TOF MICROMASS (ESI-MS)  
SANJAY METHOXY SILT 8 (0.213) Cm (5:11-20:31x2.000)

SAIF/CIL, PANJAB UNIVERSITY, CHANDIGARH  
TOF MS ES+  
1.54e3

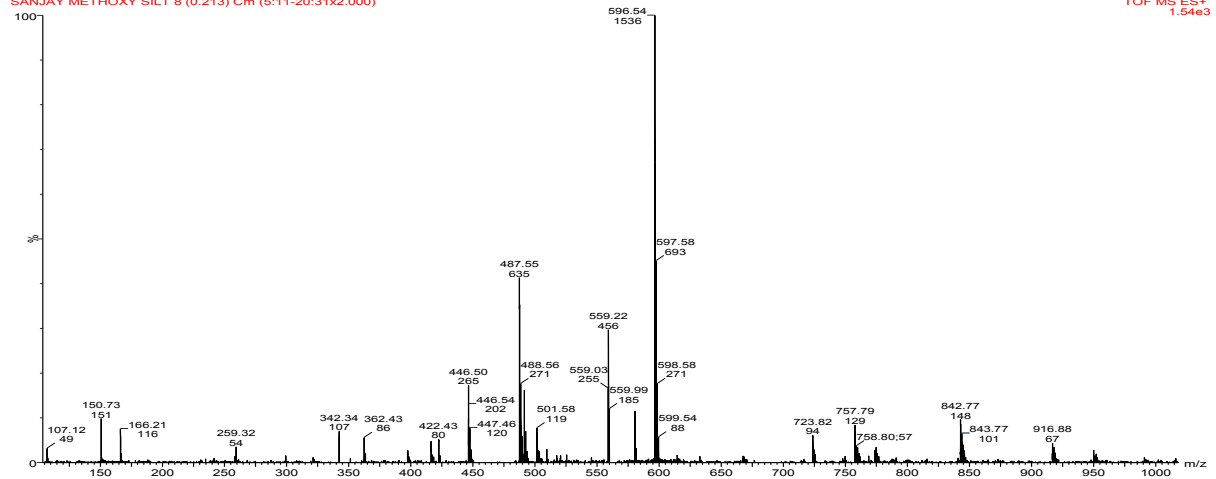

Jul31-2019, 20.fid  
ETHOXY SILASTARNE  
1H\_8scan DMSO (D:\Spectra) nmr 2

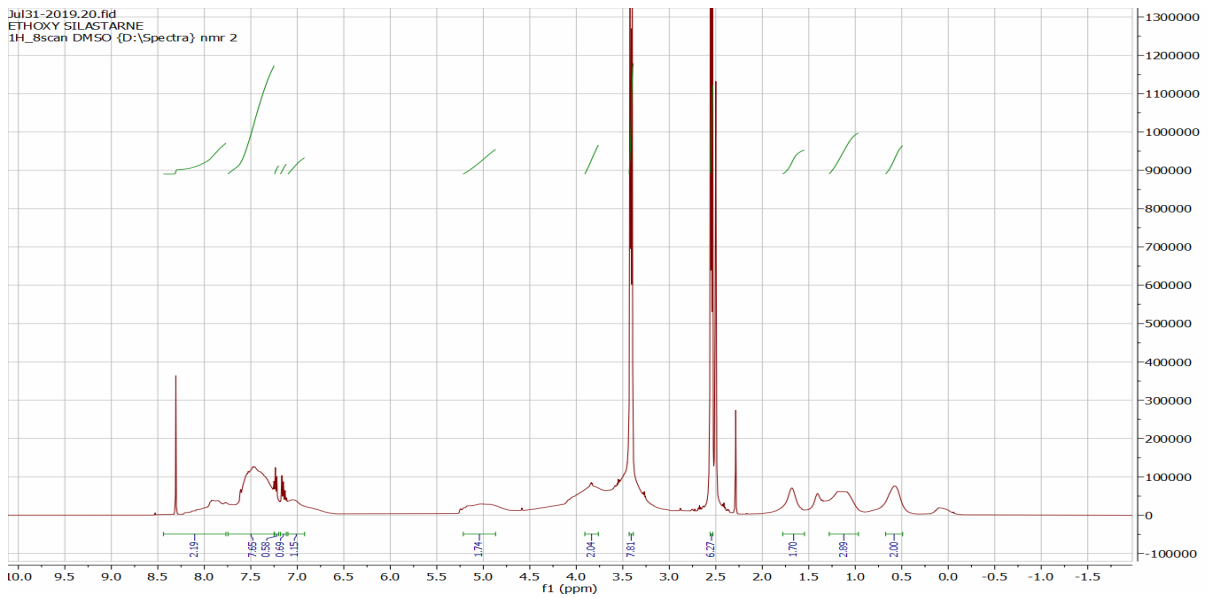

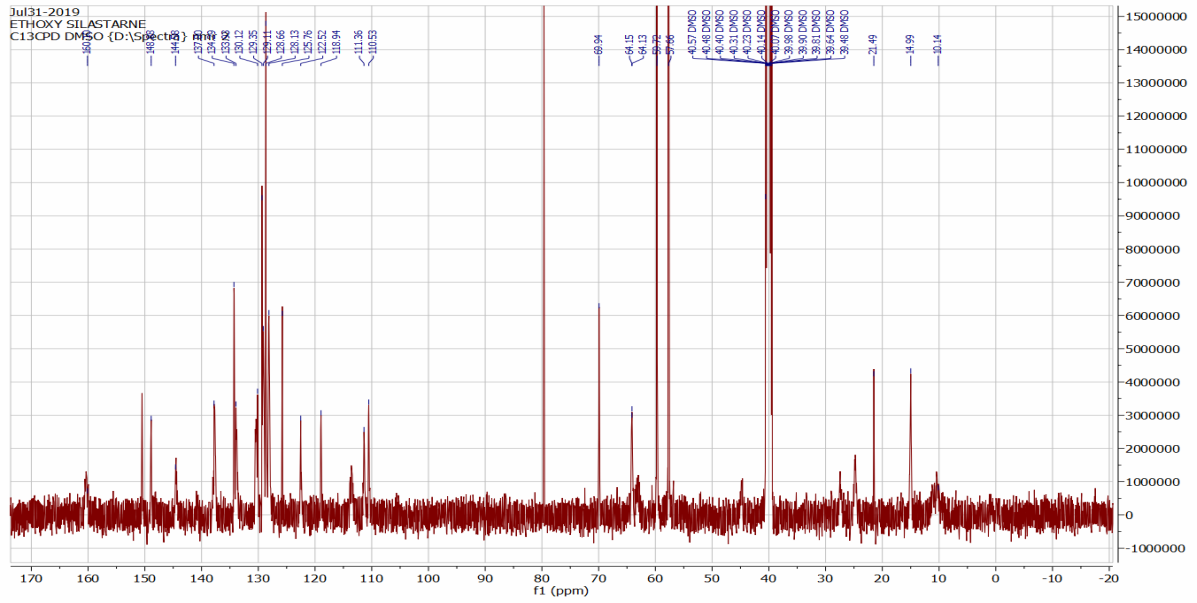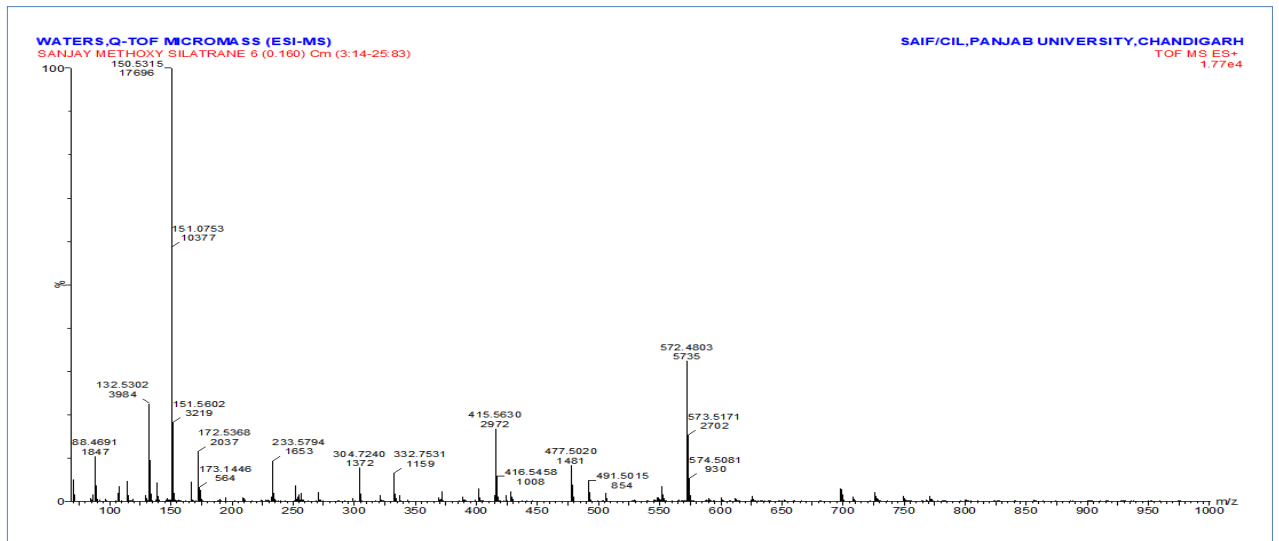

### Selected bond lengths (Å) for 5 (c)

Parameter X-ray Parameter X-ray parameter

|        |             |         |            |
|--------|-------------|---------|------------|
| Si1 O3 | 1.6425 (18) | C16-C15 | 1.373 (3)  |
| Si1 O1 | 1.647 (2)   | C24C29  | 1.381 (4)  |
| Si1 O2 | 1.656 (2)   | C24C21  | 1.499 (3)  |
| Si1 N1 | 2.182 (3)   | C24C25  | 1.385 (4)  |
| Si1 C7 | 1.866 (3)   | C13C12  | 1.388 (3)  |
| O4 C14 | 1.366 (3)   | C29C28  | 1.396 (3)  |
| O4 C17 | 1.405 (3)   | C29C30  | 1.451 (4)  |
| O3 C6  | 1.407 (3)   | C28C27  | 1.365 (4)  |
| N2 C10 | 1.251 (3)   | C22C21  | 1.379 (3)  |
| N2 C9  | 1.463 (3)   | C2 C23  | 1.386 (3)  |
| O1 C1  | 1.411 (4)   | C27C26  | 1.370 (4)  |
| O2 C4  | 1.404 (4)   | C21C20  | 1.387 (4)  |
| N1 C2A | 1.461 (6)   | C18C23  | 1.382 (4)  |
| N1 C2B | 1.530 (10)  | C18C17  | 1.503 (3)  |
| N1 C3A | 1.509 (6)   | C18C19  | 1.368 (4)  |
| N1 C3B | 1.391 (8)   | C25C26  | 1.376 (3)  |
| N1 C5A | 1.459 (10)  | N3 C30  | 1.137 (4)  |
| N1 C5B | 1.445 (9)   | C20C19  | 1.379 (4)  |
| C11C10 | 1.473 (3)   | C4 C3A  | 1.501 (6)  |
| C11C16 | 1.389 (3)   | C4 C3B  | 1.635 (11) |
| C11C12 | 1.373 (3)   | C6 C5A  | 1.593 (11) |
| C14C13 | 1.377 (4)   | C6 C5B  | 1.400 (12) |
| C14C15 | 1.387 (4)   | C1 C2A  | 1.592 (7)  |
| C8 C9  | 1.510 (4)   | C1 C2B  | 1.461 (8)  |
| C8 C7  | 1.511 (4)   |         |            |

---

### **Bond Angles for 5c**

Atom AtomAtom Angle/      Atom Atom Atom Angle

---

|         |         |         |             |               |             |
|---------|---------|---------|-------------|---------------|-------------|
| O3      | Si1     | O1      | 119.35 (13) | C25 C24 C21   | 119.5 (3)   |
| O3      | Si1     | O2      | 118.41 (12) | C14 C13 C12   | 119.5 (3)   |
| O3      | Si1     | N1      | 81.88 (9)   | C24 C29 C28   | 120.7 (3)   |
| O3      | Si1     | C7      | 97.40 (11)  | C24 C29 C30   | 122.7 (2)   |
| O1      | Si1     | O2      | 117.03 (12) | C28 C29 C30   | 116.5 (3)   |
| O1      | Si1     | N1      | 83.09 (10)  | C11 C12 C13   | 121.9 (2)   |
| O1      | Si1     | C7      | 98.29 (12)  | N2 C9 C8      | 111.8 (2)   |
| O2      | Si1     | N1      | 82.14 (11)  | C16 C15 C14   | 120.5 (2)   |
| O2      | Si1     | C7      | 97.19 (12)  | C27 C28 C29   | 121.1 (3)   |
| C7      | Si1     | N1      | 178.61 (11) | C8 C7 Si1     | 117.44 (19) |
| C14     | O4      | C17     | 117.3 (2)   | C21 C22 C23   | 121.1 (2)   |
| C6      | O3      | Si1     | 125.05 (19) | C28 C27 C26   | 118.4 (3)   |
| C10     | N2      | C9      | 118.3 (2)   | C22 C21 C24   | 123.7 (2)   |
| C1      | O1      | Si1     | 123.7 (2)   | C22 C21 C20   | 118.0 (2)   |
| C4      | O2      | Si1     | 124.2 (2)   | C20 C21 C24   | 118.2 (2)   |
| C2<br>A | N1      | Si1     | 105.0 (3)   | C23 C18 C17   | 124.3 (2)   |
| C2<br>A | N1      | C3<br>A | 111.6 (4)   | C19 C18 C23   | 118.2 (2)   |
| C2B     | N1      | Si1     | 101.1 (4)   | C19 C18 C17   | 117.5 (2)   |
| C3<br>A | N1      | Si1     | 104.1 (2)   | C26 C25 C24   | 121.6 (3)   |
| C3B     | N1      | Si1     | 107.3 (4)   | C27 C26 C25   | 121.0 (3)   |
| C3B     | N1      | C2B     | 111.3 (6)   | C18 C23 C22   | 120.5 (3)   |
| C3B     | N1      | C5B     | 124.2 (7)   | N3 C30 C29    | 177.1 (3)   |
| C5<br>A | N1      | Si1     | 109.2 (5)   | O4 C17 C18    | 111.1 (2)   |
| C5<br>A | N1      | C2<br>A | 114.7 (5)   | C19 C20 C21   | 120.4 (3)   |
| C5<br>A | N1      | C3<br>A | 111.4 (5)   | C18 C19 C20   | 121.8 (3)   |
| C5B     | N1      | Si1     | 103.3 (4)   | O2 C4 C3<br>A | 110.6 (3)   |
| C5B     | N1      | C2B     | 107.0 (6)   | O2 C4 C3B     | 109.5 (4)   |
| C16     | C1<br>1 | C10     | 122.0 (2)   | O3 C6 C5<br>A | 112.0 (4)   |
| C12     | C1<br>1 | C10     | 120.1 (2)   | C5<br>B C6 O3 | 111.8 (4)   |
| C12     | C1<br>1 | C16     | 117.9 (2)   | O1 C1 C2<br>A | 108.3 (3)   |

---

|     |         |     |          |    |         |     |          |
|-----|---------|-----|----------|----|---------|-----|----------|
| N2  | C1<br>0 | C11 | 124.4(2) | O1 | C1      | C2B | 111.8(4) |
| O4  | C1<br>4 | C13 | 124.7(2) | N1 | C2<br>A | C1  | 103.0(4) |
| O4  | C1<br>4 | C15 | 116.1(2) | C1 | C2BN1   |     | 106.1(5) |
| C13 | C1<br>4 | C15 | 119.3(2) | C4 | C3<br>A | N1  | 104.0(4) |
| C9  | C8      | C7  | 114.2(2) | N1 | C3B     | C4  | 102.9(6) |
| C15 | C1<br>6 | C11 | 121.0(2) | N1 | C5<br>A | C6  | 101.7(6) |
| C29 | C2<br>4 | C21 | 123.3(2) | C6 | C5BN1   |     | 112.7(7) |
| C29 | C2<br>4 | C25 | 117.2(2) |    |         |     |          |

---
